# Supplementary material for: Retinal Pigment Epithelial Cells are a Potential Reservoir for Ebola Virus in the Human Eye
Source: PubMed Central journal article supplement — Transl Vis Sci Technol. 2017 Jul 14;6(4):12. doi: 10.1167/tvst.6.4.12 (PMC5512973; doi:10.1167/tvst.6.4.12), 2017-07-14
Supplement: tvst-06-04-11_s01.pdf [file tvst-06-04-11_s01.pdf]

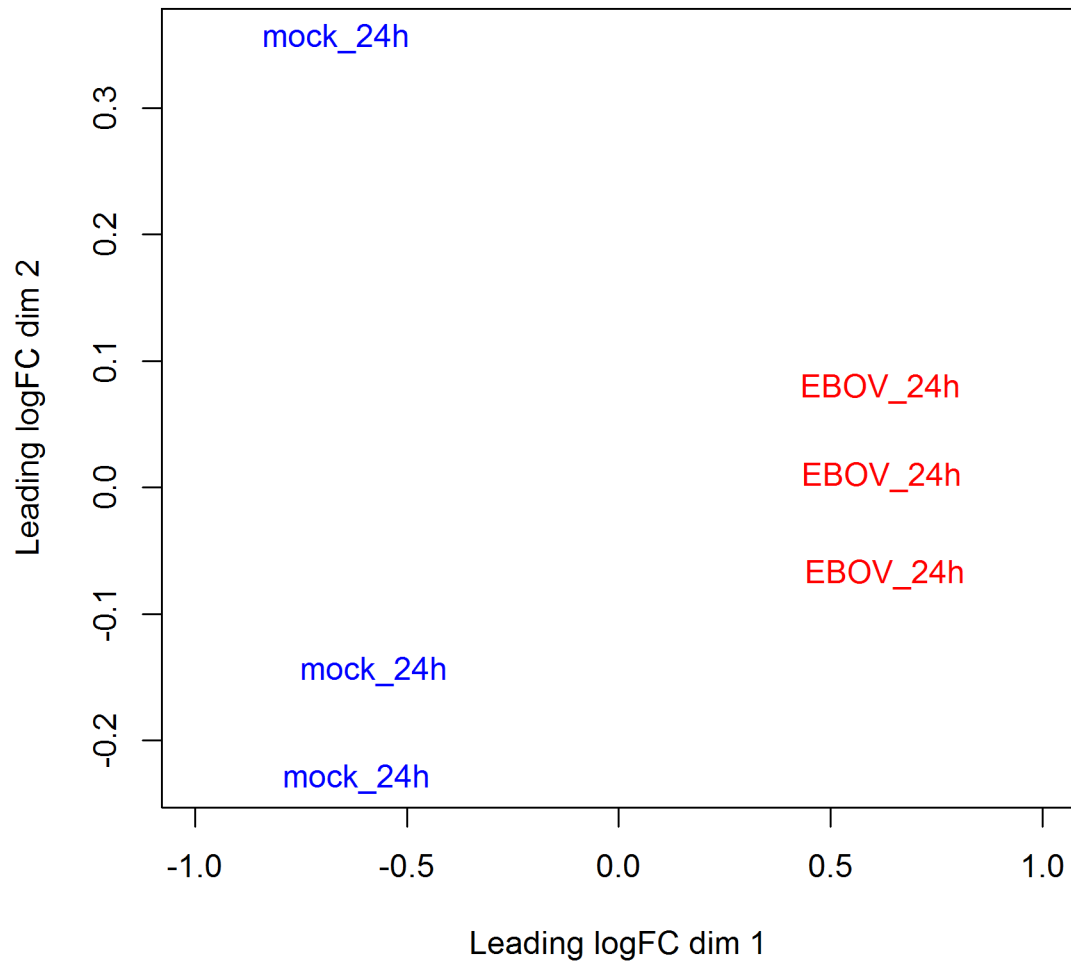

**Fig. S1.** Multidimensional scaling plot presenting comprehensive gene expression by RNA sequencing for ARPE-19 human retinal pigment epithelial cells 24 hours following infection with EBOV or mock-infection.
