# Supplementary material for: Retinal Pigment Epithelial Cells are a Potential Reservoir for Ebola Virus in the Human Eye
Source: PubMed Central journal article supplement — Transl Vis Sci Technol. 2017 Jul 14;6(4):12. doi: 10.1167/tvst.6.4.12 (PMC5512973; doi:10.1167/tvst.6.4.12), 2017-07-14
Supplement: tvst-06-04-11_s05.pdf [file tvst-06-04-11_s05.pdf]

**Table S2.** Alignment statistics for RNA sequencing on total RNA extracted from ARPE-19 human retinal pigment epithelial cells 24 hours following infection with EBOV or mock-infection.

| <b>Isolate</b> | <b>Paired reads</b> | <b>Paired reads aligning to<br/>genome (%)</b> | <b>Paired reads aligning unambiguously to<br/>annotated genes (%)</b> |
|----------------|---------------------|------------------------------------------------|-----------------------------------------------------------------------|
| Mock 1         | 50,073,823          | 47,057,907 (94)                                | 26,252,038 (56)                                                       |
| Mock 2         | 38,703,899          | 36,552,879 (94)                                | 20,848,916 (57)                                                       |
| Mock 3         | 43,369,278          | 40,004,946 (92)                                | 22,051,815 (55)                                                       |
| EBOV 1         | 50,947,987          | 40,987,678 (80)                                | 23,104,561 (56)                                                       |
| EBOV 2         | 37,194,232          | 29,264,883 (79)                                | 15,833,538 (54)                                                       |
| EBOV 3         | 59,771,257          | 47,674,511 (80)                                | 25,207,324 (53)                                                       |
| <b>Mean</b>    | <b>46,676,746</b>   | <b>40,257,134 (87)</b>                         | <b>22,216,365 (55)</b>                                                |
