# Supplementary material for: Retinal Pigment Epithelial Cells are a Potential Reservoir for Ebola Virus in the Human Eye
Source: PubMed Central journal article supplement — Transl Vis Sci Technol. 2017 Jul 14;6(4):12. doi: 10.1167/tvst.6.4.12 (PMC5512973; doi:10.1167/tvst.6.4.12), 2017-07-14
Supplement: tvst-06-04-11_s06.pdf [file tvst-06-04-11_s06.pdf]

**Table S3.** Significantly up- and down-regulated transcripts in ARPE-19 human retinal pigment epithelial cells 24 hours following infection with EBOV.

| <b>Symbol</b> | <b>Ensembl ID</b> | <b>Name</b>                                               | <b>Fold change</b> | <b>False discovery rate</b> |
|---------------|-------------------|-----------------------------------------------------------|--------------------|-----------------------------|
| ATF3          | ENSG00000162772   | activating transcription factor 3                         | 12.74              | 1.51E-197                   |
| CEBPG         | ENSG00000153879   | CCAAT/enhancer binding protein gamma                      | 9.53               | 3.86E-166                   |
| E2F7          | ENSG00000165891   | E2F transcription factor 7                                | 9.42               | 8.40E-160                   |
| TRIB3         | ENSG00000101255   | tribbles pseudokinase 3                                   | 18.28              | 7.78E-159                   |
| ADAMTS1       | ENSG00000154734   | ADAM metalloproteinase with thrombospondin type 1 motif 1 | 7.28               | 5.22E-131                   |
| ALDH1A3       | ENSG00000184254   | aldehyde dehydrogenase 1 family member A3                 | -7.29              | 3.19E-123                   |
| HKDC1         | ENSG00000156510   | hexokinase domain containing 1                            | 5.01               | 7.55E-115                   |
| LIPG          | ENSG00000101670   | lipase G, endothelial type                                | 6.80               | 3.24E-114                   |
| ETV5          | ENSG00000244405   | ETS variant 5                                             | 5.55               | 1.06E-109                   |

|         |                 |                                                         |       |           |
|---------|-----------------|---------------------------------------------------------|-------|-----------|
| DDIT3   | ENSG00000175197 | DNA damage inducible transcript 3                       | 6.56  | 1.28E-108 |
| WARS    | ENSG00000140105 | tryptophanyl-tRNA synthetase                            | 4.73  | 7.61E-106 |
| STON2   | ENSG00000140022 | stonin 2                                                | -4.55 | 8.27E-104 |
| GJA1    | ENSG00000152661 | gap junction protein alpha 1                            | -4.68 | 1.93E-100 |
| LMOD1   | ENSG00000163431 | leiomodin 1                                             | -8.50 | 7.47E-98  |
| TMEM37  | ENSG00000171227 | transmembrane protein 37                                | -5.94 | 1.05E-94  |
| MAFF    | ENSG00000185022 | MAF bZIP transcription factor F                         | 7.30  | 5.50E-88  |
| HSPA1B  | ENSG00000224501 | heat shock protein family A (Hsp70) member 1B           | 5.90  | 1.06E-87  |
| SAMD4A  | ENSG00000020577 | sterile alpha motif domain containing 4A                | 3.96  | 1.11E-86  |
| ARHGEF3 | ENSG00000163947 | Rho guanine nucleotide exchange factor 3                | -3.76 | 4.02E-86  |
| RSAD2   | ENSG00000134321 | radical S-adenosyl methionine domain containing<br>2    | 80.13 | 1.22E-85  |
| HK2     | ENSG00000159399 | hexokinase 2                                            | 4.11  | 1.22E-85  |
| KCNQ3   | ENSG00000184156 | potassium voltage-gated channel subfamily Q<br>member 3 | 9.40  | 6.49E-83  |
| VEGFA   | ENSG00000112715 | vascular endothelial growth factor A                    | 3.64  | 6.93E-81  |

|           |                 |                                                             |       |          |
|-----------|-----------------|-------------------------------------------------------------|-------|----------|
| RORA      | ENSG00000069667 | RAR related orphan receptor A                               | 4.30  | 4.80E-79 |
| SLC2A3    | ENSG00000059804 | solute carrier family 2 member 3                            | 3.55  | 1.02E-78 |
| TGFA      | ENSG00000163235 | transforming growth factor alpha                            | 3.76  | 1.11E-77 |
| IFIT2     | ENSG00000119922 | interferon induced protein with tetratricopeptide repeats 2 | 5.98  | 7.58E-77 |
| LINC01105 | ENSG00000232044 | long intergenic non-protein coding RNA 1105                 | -4.57 | 9.12E-77 |
| NDRG1     | ENSG00000104419 | N-myc downstream regulated 1                                | 4.19  | 2.07E-76 |
| LOC285629 |                 |                                                             | -5.25 | 2.84E-74 |
| ASNS      | ENSG00000070669 | asparagine synthetase (glutamine-hydrolyzing)               | 4.17  | 1.89E-73 |
| CCL2      | ENSG00000108691 | C-C motif chemokine ligand 2                                | -8.23 | 4.01E-73 |
| LURAP1L   | ENSG00000153714 | leucine rich adaptor protein 1 like                         | 5.12  | 4.15E-73 |
| PSAT1     | ENSG00000135069 | phosphoserine aminotransferase 1                            | 5.09  | 1.84E-72 |
| HSPA1A    | ENSG00000237724 | heat shock protein family A (Hsp70) member 1A               | 6.05  | 1.09E-71 |
| MX1       | ENSG00000157601 | MX dynamin like GTPase 1                                    | 11.75 | 2.19E-71 |
| AARS      | ENSG00000090861 | alanyl-tRNA synthetase                                      | 3.18  | 6.23E-70 |
| OASL      | ENSG00000135114 | 2'-5'-oligoadenylate synthetase like                        | 34.95 | 3.16E-68 |

|          |                 |                                                             |        |          |
|----------|-----------------|-------------------------------------------------------------|--------|----------|
| GARS     | ENSG00000106105 | glycyl-tRNA synthetase                                      | 3.36   | 1.34E-67 |
| KLHL4    | ENSG00000102271 | kelch like family member 4                                  | -4.35  | 1.55E-67 |
| RNF24    | ENSG00000101236 | ring finger protein 24                                      | 3.53   | 2.18E-67 |
| ERICH5   | ENSG00000177459 | glutamate rich 5                                            | -5.45  | 3.14E-67 |
| IFIT1    | ENSG00000185745 | interferon induced protein with tetratricopeptide repeats 1 | 4.61   | 2.54E-66 |
| OAS1     | ENSG00000089127 | 2'-5'-oligoadenylate synthetase 1                           | 15.17  | 2.72E-65 |
| SLC39A14 | ENSG00000104635 | solute carrier family 39 member 14                          | 3.12   | 4.36E-65 |
| NIM1K    | ENSG00000177453 | NIM1 serine/threonine protein kinase                        | 10.43  | 6.08E-65 |
| EDN2     | ENSG00000127129 | endothelin 2                                                | -11.11 | 4.36E-64 |
| KRT13    | ENSG00000171401 | keratin 13                                                  | -6.70  | 4.36E-64 |
| PPP1R15A | ENSG00000087074 | protein phosphatase 1 regulatory subunit 15A                | 3.16   | 9.22E-64 |
| DUSP5    | ENSG00000138166 | dual specificity phosphatase 5                              | 5.09   | 3.73E-63 |
| GRM1     | ENSG00000152822 | glutamate metabotropic receptor 1                           | -7.69  | 4.33E-63 |
| NFIL3    | ENSG00000165030 | nuclear factor, interleukin 3 regulated                     | 3.92   | 1.16E-62 |
| YARS     | ENSG00000134684 | tyrosyl-tRNA synthetase                                     | 2.96   | 3.33E-62 |

|         |                 |                                                                   |       |          |
|---------|-----------------|-------------------------------------------------------------------|-------|----------|
| TM4SF1  | ENSG00000169908 | transmembrane 4 L six family member 1                             | -3.35 | 6.59E-62 |
| PFKFB4  | ENSG00000114268 | 6-phosphofructo-2-kinase/fructose-2,6-<br>biphosphatase 4         | 5.63  | 1.14E-61 |
| RIMKLA  | ENSG00000177181 | ribosomal modification protein rimK-like family<br>member A       | 5.03  | 2.12E-60 |
| ELF3    | ENSG00000163435 | E74 like ETS transcription factor 3                               | -7.27 | 3.86E-60 |
| ZFP36L2 | ENSG00000152518 | ZFP36 ring finger protein-like 2                                  | -3.66 | 3.96E-60 |
| PTGIS   | ENSG00000124212 | prostaglandin I2 (prostacyclin) synthase                          | -3.69 | 4.48E-60 |
| CYP1B1  | ENSG00000138061 | cytochrome P450 family 1 subfamily B member 1                     | -3.76 | 1.04E-59 |
| INSIG1  | ENSG00000186480 | insulin induced gene 1                                            | 2.97  | 3.33E-58 |
| ABCA1   | ENSG00000165029 | ATP binding cassette subfamily A member 1                         | -2.79 | 8.08E-58 |
| HERPUD1 | ENSG00000051108 | homocysteine inducible ER protein with ubiquitin<br>like domain 1 | 2.73  | 1.46E-57 |
| LDLR    | ENSG00000130164 | low density lipoprotein receptor                                  | 3.31  | 2.85E-56 |
| IFI44L  | ENSG00000137959 | interferon induced protein 44 like                                | 9.02  | 4.04E-56 |

|         |                 |                                                             |       |          |
|---------|-----------------|-------------------------------------------------------------|-------|----------|
| MANF    | ENSG00000145050 | mesencephalic astrocyte derived neurotrophic factor         | 3.20  | 4.46E-56 |
| FRMD4B  | ENSG00000114541 | FERM domain containing 4B                                   | -3.07 | 2.28E-55 |
| STARD4  | ENSG00000164211 | StAR related lipid transfer domain containing 4             | 3.59  | 5.23E-55 |
| ARID5A  | ENSG00000196843 | AT-rich interaction domain 5A                               | 4.90  | 5.64E-55 |
| ANGPTL7 | ENSG00000171819 | angiopoietin like 7                                         | -4.91 | 7.32E-55 |
| SPRY1   | ENSG00000164056 | sprouty RTK signaling antagonist 1                          | 8.49  | 2.61E-54 |
| FOSL1   | ENSG00000175592 | FOS like 1, AP-1 transcription factor subunit               | 5.37  | 4.18E-54 |
| FAM210A | ENSG00000177150 | family with sequence similarity 210 member A                | 3.11  | 4.72E-54 |
| SLC20A1 | ENSG00000144136 | solute carrier family 20 member 1                           | 2.78  | 1.26E-53 |
| CREB5   | ENSG00000146592 | cAMP responsive element binding protein 5                   | 3.79  | 3.50E-53 |
| IFIT3   | ENSG00000119917 | interferon induced protein with tetratricopeptide repeats 3 | 4.84  | 3.54E-53 |
| DIO2    | ENSG00000211448 | deiodinase, iodothyronine, type II                          | -3.48 | 2.38E-52 |
| BMP6    | ENSG00000153162 | bone morphogenetic protein 6                                | -4.61 | 4.58E-52 |
| ZNF697  | ENSG00000143067 | zinc finger protein 697                                     | 3.26  | 5.76E-52 |

|         |                 |                                                      |       |          |
|---------|-----------------|------------------------------------------------------|-------|----------|
| XBP1    | ENSG00000100219 | X-box binding protein 1                              | 2.66  | 6.03E-52 |
| NCR3LG1 | ENSG00000188211 | natural killer cell cytotoxicity receptor 3 ligand 1 | 3.10  | 1.35E-51 |
| NOCT    | ENSG00000151014 | nocturnin                                            | 5.23  | 1.66E-51 |
| KLF4    | ENSG00000136826 | Kruppel like factor 4                                | 5.72  | 3.02E-51 |
| SQLE    | ENSG00000104549 | squalene epoxidase                                   | 2.76  | 3.16E-51 |
| TMEM50B | ENSG00000142188 | transmembrane protein 50B                            | 3.41  | 1.01E-50 |
| KLF6    | ENSG00000067082 | Kruppel like factor 6                                | 3.32  | 1.68E-50 |
| ADORA2B | ENSG00000170425 | adenosine A2b receptor                               | 3.34  | 2.31E-50 |
| HSPA5   | ENSG00000044574 | heat shock protein family A (Hsp70) member 5         | 5.20  | 9.47E-50 |
| FAM198B | ENSG00000164125 | family with sequence similarity 198 member B         | -3.21 | 1.03E-49 |
| FAXDC2  | ENSG00000170271 | fatty acid hydroxylase domain containing 2           | -3.55 | 7.75E-49 |
| MKNK2   | ENSG00000099875 | MAP kinase interacting serine/threonine kinase 2     | 3.65  | 8.01E-49 |
| SESN2   | ENSG00000130766 | sestrin 2                                            | 3.42  | 1.06E-48 |
| PRKCE   | ENSG00000171132 | protein kinase C epsilon                             | 3.57  | 1.47E-48 |
| PCDH20  | ENSG00000280165 | protocadherin 20                                     | -8.60 | 2.92E-48 |

|          |                 |                                                                    |       |          |
|----------|-----------------|--------------------------------------------------------------------|-------|----------|
| CYP24A1' | ENSG00000019186 | cytochrome P450 family 24 subfamily A member<br>1                  | -2.92 | 3.53E-48 |
| UAP1     | ENSG00000117143 | UDP-N-acetylglucosamine pyrophosphorylase 1                        | 2.75  | 6.94E-48 |
| CCDC85A  | ENSG00000055813 | coiled-coil domain containing 85A                                  | -2.86 | 8.51E-48 |
| SLC7A11  | ENSG00000151012 | solute carrier family 7 member 11                                  | 3.90  | 1.46E-47 |
| SLITRK4  | ENSG00000179542 | SLIT and NTRK like family member 4                                 | -3.52 | 2.45E-47 |
| ATP1B1   | ENSG00000143153 | ATPase Na <sup>+</sup> /K <sup>+</sup> transporting subunit beta 1 | -3.01 | 1.22E-46 |
| HMGCR    | ENSG00000113161 | 3-hydroxy-3-methylglutaryl-CoA reductase                           | 2.65  | 1.23E-46 |
| NREP     | ENSG00000134986 | neuronal regeneration related protein                              | -2.69 | 1.31E-46 |
| SLC7A8   | ENSG00000092068 | solute carrier family 7 member 8                                   | -4.46 | 2.10E-46 |
| ADORA1   | ENSG00000163485 | adenosine A1 receptor                                              | -5.42 | 2.70E-46 |
| CNIH3    | ENSG00000143786 | cornichon family AMPA receptor auxiliary protein<br>3              | 5.07  | 2.97E-46 |
| SEPP1    | ENSG00000250722 | selenoprotein P, plasma, 1                                         | -4.81 | 4.64E-46 |
| SLC2A12  | ENSG00000146411 | solute carrier family 2 member 12                                  | -2.75 | 2.67E-44 |
| DYNLL1   | ENSG00000088986 | dynein light chain LC8-type 1                                      | 2.53  | 3.46E-44 |



|          |                 |                                                       |       |          |
|----------|-----------------|-------------------------------------------------------|-------|----------|
| RNF13    | ENSG00000082996 | ring finger protein 13                                | -2.88 | 4.13E-44 |
| PCK2     | ENSG00000100889 | phosphoenolpyruvate carboxykinase 2,<br>mitochondrial | 3.51  | 4.77E-44 |
| TAF4B    | ENSG00000141384 | TATA-box binding protein associated factor 4b         | 3.26  | 4.77E-44 |
| SESN3    | ENSG00000149212 | sestrin 3                                             | -3.45 | 6.66E-44 |
| NOG      | ENSG00000183691 | noggin                                                | 6.65  | 7.69E-44 |
| OAS2     | ENSG00000111335 | 2'-5'-oligoadenylate synthetase 2                     | 45.71 | 1.30E-43 |
| PCDH18   | ENSG00000189184 | protocadherin 18                                      | -6.81 | 1.79E-43 |
| PRSS23   | ENSG00000150687 | protease, serine 23                                   | -2.51 | 2.75E-43 |
| IL1RAP   | ENSG00000196083 | interleukin 1 receptor accessory protein              | 3.41  | 3.14E-43 |
| IVNS1ABP | ENSG00000116679 | influenza virus NS1A binding protein                  | -2.65 | 3.54E-43 |
| HRK      | ENSG00000135116 | harakiri, BCL2 interacting protein                    | 4.49  | 4.18E-43 |
| SOX4     | ENSG00000124766 | SRY-box 4                                             | -2.45 | 5.00E-43 |
| MARS     | ENSG00000166986 | methionyl-tRNA synthetase                             | 2.99  | 7.02E-43 |
| PALMD    | ENSG00000099260 | Palmdelphin                                           | -8.42 | 1.66E-42 |

|         |                 |                                                                     |       |          |
|---------|-----------------|---------------------------------------------------------------------|-------|----------|
| GPT2    | ENSG00000166123 | glutamic pyruvate transaminase (alanine<br>aminotransferase) 2      | 3.22  | 5.72E-42 |
| MXD1    | ENSG00000059728 | MAX dimerization protein 1                                          | 3.46  | 1.08E-41 |
| TLE4    | ENSG00000106829 | transducin like enhancer of split 4                                 | -2.46 | 2.67E-41 |
| SCD     | ENSG00000099194 | stearoyl-CoA desaturase                                             | 2.34  | 4.43E-41 |
| TRIM25  | ENSG00000121060 | tripartite motif containing 25                                      | 2.56  | 6.53E-41 |
| ZBTB10  | ENSG00000205189 | zinc finger and BTB domain containing 10                            | 2.77  | 1.06E-40 |
| CHAC1   | ENSG00000128965 | ChaC glutathione specific gamma-<br>glutamylcyclotransferase 1      | 19.27 | 1.30E-40 |
| IFRD1   | ENSG00000006652 | interferon related developmental regulator 1                        | 2.51  | 1.60E-40 |
| PPFIA4  | ENSG00000143847 | PTPRF interacting protein alpha 4                                   | 2.86  | 2.01E-40 |
| HILPDA  | ENSG00000135245 | hypoxia inducible lipid droplet associated                          | 2.79  | 2.49E-40 |
| MTHFD1L | ENSG00000120254 | methylenetetrahydrofolate dehydrogenase<br>(NADP+ dependent) 1-like | 2.26  | 3.73E-40 |
| B3GNT5  | ENSG00000176597 | UDP-GlcNAc:betaGal beta-1,3-N-<br>acetylglucosaminyltransferase 5   | 4.36  | 4.36E-40 |

|           |                 |                                                      |        |          |
|-----------|-----------------|------------------------------------------------------|--------|----------|
| LOC728392 |                 |                                                      | -3.84  | 5.14E-40 |
| C10orf10  | ENSG00000165507 | chromosome 10 open reading frame 10                  | 3.15   | 7.77E-40 |
| XPOT      | ENSG00000184575 | exportin for tRNA                                    | 2.59   | 1.24E-39 |
| PHLDA1    | ENSG00000139289 | pleckstrin homology like domain family A member<br>1 | 3.39   | 1.44E-39 |
| CD274     | ENSG00000120217 | CD274 molecule                                       | 4.93   | 2.98E-39 |
| BAMBI     | ENSG00000095739 | BMP and activin membrane bound inhibitor             | -2.55  | 3.07E-39 |
| KIAA1683  | ENSG00000130518 | KIAA1683                                             | 7.58   | 6.91E-39 |
| DDX58     | ENSG00000107201 | DEXD/H-box helicase 58                               | 2.84   | 1.37E-38 |
| CLEC19A   | ENSG00000261210 | C-type lectin domain family 19 member A              | -13.69 | 1.55E-38 |
| FUT11     | ENSG00000196968 | fucosyltransferase 11                                | 2.61   | 1.96E-38 |
| OTX2      | ENSG00000165588 | orthodenticle homeobox 2                             | -2.46  | 5.72E-38 |
| SH3D21    | ENSG00000214193 | SH3 domain containing 21                             | 3.03   | 6.66E-38 |
| BRINP1    | ENSG00000078725 | BMP/retinoic acid inducible neural specific 1        | -4.37  | 6.83E-38 |
| LOC730101 |                 |                                                      | -2.41  | 1.27E-37 |
| ERBB4     | ENSG00000178568 | erb-b2 receptor tyrosine kinase 4                    | -3.18  | 2.59E-37 |

|         |                 |                                                              |       |          |
|---------|-----------------|--------------------------------------------------------------|-------|----------|
| LRRC1   | ENSG00000137269 | leucine rich repeat containing 1                             | -2.32 | 3.68E-37 |
| RGS7BP  | ENSG00000186479 | regulator of G-protein signaling 7 binding protein           | -3.38 | 7.42E-37 |
| ALDH3A2 | ENSG00000072210 | aldehyde dehydrogenase 3 family member A2                    | -2.28 | 7.86E-37 |
| TSPAN13 | ENSG00000106537 | tetraspanin 13                                               | -2.52 | 1.42E-36 |
| AK4     | ENSG00000162433 | adenylate kinase 4                                           | 2.33  | 1.42E-36 |
| SNHG3   | ENSG00000242125 | small nucleolar RNA host gene 3                              | -2.58 | 2.30E-36 |
| FOXQ1   | ENSG00000164379 | forkhead box Q1                                              | -4.22 | 2.50E-36 |
| TNFAIP3 | ENSG00000118503 | TNF alpha induced protein 3                                  | 5.21  | 2.81E-36 |
| MVK     | ENSG00000110921 | mevalonate kinase                                            | 3.13  | 3.23E-36 |
| TRIB2   | ENSG00000071575 | tribbles pseudokinase 2                                      | 3.45  | 3.30E-36 |
| EIF2AK3 | ENSG00000172071 | eukaryotic translation initiation factor 2 alpha<br>kinase 3 | 2.35  | 3.91E-36 |
| PIGA    | ENSG00000165195 | phosphatidylinositol glycan anchor biosynthesis<br>class A   | 3.27  | 4.56E-36 |
| PDE4D   | ENSG00000113448 | phosphodiesterase 4D                                         | 12.96 | 9.18E-36 |
| PPL     | ENSG00000118898 | periplakin                                                   | -3.26 | 9.55E-36 |

|         |                 |                                                       |       |          |
|---------|-----------------|-------------------------------------------------------|-------|----------|
| C2orf72 | ENSG00000204128 | chromosome 2 open reading frame 72                    | 3.90  | 1.05E-35 |
| USP31   | ENSG00000103404 | ubiquitin specific peptidase 31                       | 2.55  | 1.15E-35 |
| FZD4    | ENSG00000174804 | frizzled class receptor 4                             | -2.50 | 1.24E-35 |
| ADCY1   | ENSG00000164742 | adenylate cyclase 1 (brain)                           | 3.07  | 2.04E-35 |
| STK40   | ENSG00000196182 | serine/threonine kinase 40                            | 2.70  | 4.66E-35 |
| FHL1    | ENSG00000022267 | four and a half LIM domains 1                         | -2.56 | 8.81E-35 |
| CHSY1   | ENSG00000131873 | chondroitin sulfate synthase 1                        | 2.38  | 9.95E-35 |
| LRRN1   | ENSG00000175928 | leucine rich repeat neuronal 1                        | -2.59 | 1.11E-34 |
| ABLIM3  | ENSG00000173210 | actin binding LIM protein family member 3             | 2.30  | 1.21E-34 |
| GTPBP2  | ENSG00000172432 | GTP binding protein 2                                 | 2.61  | 1.62E-34 |
| TRAF1   | ENSG00000056558 | TNF receptor associated factor 1                      | 3.27  | 1.72E-34 |
| STON1   | ENSG00000243244 | stonin 1                                              | -3.36 | 1.79E-34 |
| ENPP2   | ENSG00000136960 | ectonucleotide<br>pyrophosphatase/phosphodiesterase 2 | -3.64 | 1.81E-34 |
| IRAK2   | ENSG00000134070 | interleukin 1 receptor associated kinase 2            | 3.38  | 2.68E-34 |
| ISG15   | ENSG00000187608 | ISG15 ubiquitin-like modifier                         | 4.25  | 3.05E-34 |

|         |                 |                                                                         |       |          |
|---------|-----------------|-------------------------------------------------------------------------|-------|----------|
| BMP4    | ENSG00000125378 | bone morphogenetic protein 4                                            | -2.38 | 3.88E-34 |
| AFAP1L1 | ENSG00000157510 | actin filament associated protein 1 like 1                              | 2.94  | 4.03E-34 |
| IFI44   | ENSG00000137965 | interferon induced protein 44                                           | 4.20  | 4.15E-34 |
| ID4     | ENSG00000172201 | inhibitor of DNA binding 4, HLH protein                                 | -2.73 | 4.22E-34 |
| BHLHE40 | ENSG00000134107 | basic helix-loop-helix family member e40                                | 2.28  | 5.31E-34 |
| COL9A2  | ENSG00000049089 | collagen type IX alpha 2                                                | -6.96 | 9.95E-34 |
| HBEGF   | ENSG00000113070 | heparin binding EGF like growth factor                                  | 2.96  | 1.25E-33 |
| IARS    | ENSG00000196305 | isoleucyl-tRNA synthetase                                               | 2.30  | 1.90E-33 |
| TMTC1   | ENSG00000133687 | transmembrane and tetratricopeptide repeat<br>containing 1              | -2.22 | 3.39E-33 |
| CYP51A1 | ENSG00000001630 | cytochrome P450 family 51 subfamily A member<br>1                       | 2.31  | 4.06E-33 |
| PAG1    | ENSG00000076641 | phosphoprotein membrane anchor with<br>glycosphingolipid microdomains 1 | 3.88  | 4.23E-33 |
| JMJD6   | ENSG00000070495 | arginine demethylase and lysine hydroxylase                             | 2.75  | 1.31E-32 |
| ETS1    | ENSG00000134954 | ETS proto-oncogene 1, transcription factor                              | 2.38  | 1.31E-32 |

|         |                 |                                                           |       |          |
|---------|-----------------|-----------------------------------------------------------|-------|----------|
| FGFR1   | ENSG00000077782 | fibroblast growth factor receptor 1                       | 2.35  | 1.56E-32 |
| HTR7P1  | ENSG00000183935 | 5-hydroxytryptamine receptor 7 pseudogene 1               | -2.87 | 1.79E-32 |
| RNF128  | ENSG00000133135 | ring finger protein 128, E3 ubiquitin protein ligase      | -3.43 | 1.81E-32 |
| TMEM164 | ENSG00000157600 | transmembrane protein 164                                 | -2.27 | 2.13E-32 |
| SMPD3   | ENSG00000103056 | sphingomyelin phosphodiesterase 3                         | -6.83 | 2.95E-32 |
| HDAC9   | ENSG00000048052 | histone deacetylase 9                                     | 2.37  | 3.50E-32 |
| ERRFI1  | ENSG00000116285 | ERBB receptor feedback inhibitor 1                        | 2.56  | 4.47E-32 |
| GAS1    | ENSG00000180447 | growth arrest specific 1                                  | -4.79 | 6.02E-32 |
| PFKFB3  | ENSG00000170525 | 6-phosphofructo-2-kinase/fructose-2,6-<br>biphosphatase 3 | 2.35  | 6.60E-32 |
| FAM219A | ENSG00000164970 | family with sequence similarity 219 member A              | 2.84  | 6.67E-32 |
| GPAT3   | ENSG00000138678 | glycerol-3-phosphate acyltransferase 3                    | 3.90  | 6.75E-32 |
| LONRF3  | ENSG00000175556 | LON peptidase N-terminal domain and ring finger<br>3      | 2.99  | 8.35E-32 |
| OSMR    | ENSG00000145623 | oncostatin M receptor                                     | 2.47  | 1.11E-31 |
| HSPH1   | ENSG00000120694 | heat shock protein family H (Hsp110) member 1             | 2.26  | 1.45E-31 |

|          |                 |                                                            |       |          |
|----------|-----------------|------------------------------------------------------------|-------|----------|
| ARHGAP31 | ENSG00000031081 | Rho GTPase activating protein 31                           | -2.70 | 1.46E-31 |
| ARRDC3   | ENSG00000113369 | arrestin domain containing 3                               | 2.50  | 1.48E-31 |
| PCDH7    | ENSG00000169851 | protocadherin 7                                            | -3.77 | 1.48E-31 |
| PUS7     | ENSG00000091127 | pseudouridylate synthase 7 (putative)                      | 2.54  | 2.00E-31 |
| SYTL2    | ENSG00000137501 | synaptotagmin like 2                                       | 2.96  | 3.34E-31 |
| HYOU1    | ENSG00000149428 | hypoxia up-regulated 1                                     | 2.40  | 4.92E-31 |
| DNAJB11  | ENSG00000090520 | DnaJ heat shock protein family (Hsp40) member<br>B11       | 2.22  | 5.18E-31 |
| SLC1A4   | ENSG00000115902 | solute carrier family 1 member 4                           | 3.06  | 6.44E-31 |
| CACNA1D  | ENSG00000157388 | calcium voltage-gated channel subunit alpha1 D             | -3.53 | 8.78E-31 |
| FAM86DP  | ENSG00000244026 | family with sequence similarity 86 member D,<br>pseudogene | 2.57  | 9.47E-31 |
| HSD17B2  | ENSG00000086696 | hydroxysteroid 17-beta dehydrogenase 2                     | -3.31 | 1.01E-30 |
| MAP7D2   | ENSG00000184368 | MAP7 domain containing 2                                   | -2.78 | 1.05E-30 |
| OAS3     | ENSG00000111331 | 2'-5'-oligoadenylate synthetase 3                          | 2.72  | 1.08E-30 |
| HOMER1   | ENSG00000152413 | homer scaffolding protein 1                                | 3.17  | 1.27E-30 |



|         |                 |                                                                |       |          |
|---------|-----------------|----------------------------------------------------------------|-------|----------|
| LGR4    | ENSG00000205213 | leucine rich repeat containing G protein-coupled<br>receptor 4 | -2.23 | 1.45E-30 |
| HEG1    | ENSG00000173706 | heart development protein with EGF like domains<br>1           | -2.57 | 2.00E-30 |
| USP18   | ENSG00000184979 | ubiquitin specific peptidase 18                                | 5.20  | 2.07E-30 |
| IGFBP5  | ENSG00000115461 | insulin like growth factor binding protein 5                   | -2.35 | 2.53E-30 |
| CMPK2   | ENSG00000134326 | cytidine/uridine monophosphate kinase 2                        | 26.34 | 3.19E-30 |
| ARHGEF2 | ENSG00000116584 | Rho/Rac guanine nucleotide exchange factor 2                   | 2.76  | 3.75E-30 |
| UAP1L1  | ENSG00000197355 | UDP-N-acetylglucosamine pyrophosphorylase 1<br>like 1          | 3.25  | 4.52E-30 |
| BMF     | ENSG00000104081 | Bcl2 modifying factor                                          | -4.76 | 5.65E-30 |
| TXNIP   | ENSG00000265972 | thioredoxin interacting protein                                | -2.25 | 5.69E-30 |
| TRIM58  | ENSG00000162722 | tripartite motif containing 58                                 | 2.53  | 5.98E-30 |
| AK2     | ENSG00000004455 | adenylate kinase 2                                             | 2.05  | 6.02E-30 |
| CHI3L1  | ENSG00000133048 | chitinase 3 like 1                                             | -3.31 | 6.40E-30 |
| HS6ST1  | ENSG00000136720 | heparan sulfate 6-O-sulfotransferase 1                         | -2.76 | 6.57E-30 |

|        |                 |                                                                 |       |          |
|--------|-----------------|-----------------------------------------------------------------|-------|----------|
| ANK3   | ENSG00000151150 | ankyrin 3, node of Ranvier (ankyrin G)                          | -2.65 | 7.85E-30 |
| FLRT3  | ENSG00000125848 | fibronectin leucine rich transmembrane protein 3                | -3.95 | 9.08E-30 |
| SARS   | ENSG00000031698 | seryl-tRNA synthetase                                           | 2.11  | 9.74E-30 |
| BTN3A3 | ENSG00000111801 | butyrophilin subfamily 3 member A3                              | -2.62 | 1.05E-29 |
| STRIP2 | ENSG00000128578 | striatin interacting protein 2                                  | -2.17 | 1.05E-29 |
| PDGFRB | ENSG00000113721 | platelet derived growth factor receptor beta                    | -2.49 | 1.25E-29 |
| ENO2   | ENSG00000111674 | enolase 2                                                       | 2.12  | 1.59E-29 |
| SH2D5  | ENSG00000189410 | SH2 domain containing 5                                         | 3.77  | 2.67E-29 |
| FMNL3  | ENSG00000161791 | formin like 3                                                   | 2.35  | 2.70E-29 |
| TCAF2  | ENSG00000170379 | TRPM8 channel associated factor 2                               | 2.82  | 3.80E-29 |
| DAB2   | ENSG00000153071 | DAB2, clathrin adaptor protein                                  | -2.27 | 4.81E-29 |
| MAF    | ENSG00000178573 | MAF bZIP transcription factor                                   | -2.51 | 5.05E-29 |
| DGKE   | ENSG00000153933 | diacylglycerol kinase epsilon                                   | 3.06  | 5.90E-29 |
| EMP2   | ENSG00000213853 | epithelial membrane protein 2                                   | -2.16 | 8.36E-29 |
| DYRK3  | ENSG00000143479 | dual specificity tyrosine phosphorylation regulated<br>kinase 3 | 2.36  | 8.38E-29 |

|          |                 |                                                             |       |          |
|----------|-----------------|-------------------------------------------------------------|-------|----------|
| FGF18    | ENSG00000156427 | fibroblast growth factor 18                                 | -7.37 | 1.28E-28 |
| FAM162A  | ENSG00000114023 | family with sequence similarity 162 member A                | 2.17  | 1.31E-28 |
| IFI6     | ENSG00000126709 | interferon alpha inducible protein 6                        | 2.76  | 1.97E-28 |
| CDO1     | ENSG00000129596 | cysteine dioxygenase type 1                                 | -2.69 | 2.17E-28 |
| PRPS1    | ENSG00000147224 | phosphoribosyl pyrophosphate synthetase 1                   | -2.24 | 2.17E-28 |
| KDM7A    | ENSG00000006459 | lysine demethylase 7A                                       | 3.22  | 2.30E-28 |
| SYT17    | ENSG00000103528 | synaptotagmin 17                                            | -3.77 | 2.49E-28 |
| PIK3IP1  | ENSG00000100100 | phosphoinositide-3-kinase interacting protein 1             | -2.88 | 2.49E-28 |
| CLDN1    | ENSG00000163347 | claudin 1                                                   | 3.28  | 2.77E-28 |
| PLEKHH2  | ENSG00000152527 | pleckstrin homology, MyTH4 and FERM domain<br>containing H2 | -2.50 | 2.88E-28 |
| SBF2-AS1 | ENSG00000246273 | SBF2 antisense RNA 1                                        | -2.76 | 3.17E-28 |
| SELENBP1 | ENSG00000143416 | selenium binding protein 1                                  | -3.12 | 3.55E-28 |
| PCDH17   | ENSG00000118946 | protocadherin 17                                            | -5.48 | 4.35E-28 |
| NID2     | ENSG00000087303 | nidogen 2                                                   | -3.03 | 4.44E-28 |
| RND3     | ENSG00000115963 | Rho family GTPase 3                                         | 2.27  | 4.52E-28 |

|          |                 |                                                         |       |          |
|----------|-----------------|---------------------------------------------------------|-------|----------|
| TICRR    | ENSG00000140534 | TOPBP1 interacting checkpoint and replication regulator | 2.94  | 4.76E-28 |
| HMGCS1   | ENSG00000112972 | 3-hydroxy-3-methylglutaryl-CoA synthase 1               | 2.66  | 5.18E-28 |
| KCTD4    | ENSG00000180332 | potassium channel tetramerization domain containing 4   | -3.50 | 6.05E-28 |
| CHORDC1  | ENSG00000110172 | cysteine and histidine rich domain containing 1         | 2.81  | 7.04E-28 |
| DUSP4    | ENSG00000120875 | dual specificity phosphatase 4                          | 2.44  | 1.02E-27 |
| SEMA4A   | ENSG00000196189 | semaphorin 4A                                           | -5.40 | 1.18E-27 |
| GALM     | ENSG00000143891 | galactose mutarotase                                    | -2.99 | 1.24E-27 |
| PDE5A    | ENSG00000138735 | phosphodiesterase 5A                                    | -2.36 | 1.26E-27 |
| GJC1     | ENSG00000182963 | gap junction protein gamma 1                            | 2.13  | 1.36E-27 |
| CDKN1B   | ENSG00000111276 | cyclin dependent kinase inhibitor 1B                    | -2.11 | 1.48E-27 |
| CXCR4    | ENSG00000121966 | C-X-C motif chemokine receptor 4                        | 2.85  | 1.94E-27 |
| FAM57A   | ENSG00000167695 | family with sequence similarity 57 member A             | 2.64  | 2.93E-27 |
| PRICKLE2 | ENSG00000163637 | prickle planar cell polarity protein 2                  | -2.03 | 3.24E-27 |
| MAP2K6   | ENSG00000108984 | mitogen-activated protein kinase kinase 6               | -8.45 | 3.54E-27 |

|          |                 |                                                             |       |          |
|----------|-----------------|-------------------------------------------------------------|-------|----------|
| ENDOD1   | ENSG00000149218 | endonuclease domain containing 1                            | -2.15 | 3.68E-27 |
| CRISPLD1 | ENSG00000121005 | cysteine rich secretory protein LCCL domain<br>containing 1 | -3.43 | 4.11E-27 |
| ERO1A    | ENSG00000197930 | endoplasmic reticulum oxidoreductase alpha                  | 2.57  | 5.44E-27 |
| PLXDC2   | ENSG00000120594 | plexin domain containing 2                                  | -2.22 | 8.12E-27 |
| FAM84B   | ENSG00000168672 | family with sequence similarity 84 member B                 | -2.08 | 9.44E-27 |
| BEX1     | ENSG00000133169 | brain expressed X-linked 1                                  | -2.16 | 9.89E-27 |
| SPRY4    | ENSG00000187678 | sprouty RTK signaling antagonist 4                          | 7.45  | 1.04E-26 |
| ST6GAL2  | ENSG00000144057 | ST6 beta-galactoside alpha-2,6-sialyltransferase<br>2       | -2.39 | 1.15E-26 |
| AGPAT5   | ENSG00000155189 | 1-acylglycerol-3-phosphate O-acyltransferase 5              | 2.19  | 2.16E-26 |
| ARID5B   | ENSG00000150347 | AT-rich interaction domain 5B                               | -2.15 | 2.37E-26 |
| RASSF1   | ENSG00000068028 | Ras association domain family member 1                      | 2.90  | 4.07E-26 |
| HELZ2    | ENSG00000130589 | helicase with zinc finger 2                                 | 3.64  | 4.07E-26 |
| GLCCI1   | ENSG00000106415 | glucocorticoid induced 1                                    | -2.86 | 4.78E-26 |
| RDH11    | ENSG00000072042 | retinol dehydrogenase 11 (all-trans/9-cis/11-cis)           | 2.00  | 5.86E-26 |

|           |                 |                                                                            |       |          |
|-----------|-----------------|----------------------------------------------------------------------------|-------|----------|
| ARHGAP26  | ENSG00000145819 | Rho GTPase activating protein 26                                           | 2.85  | 7.09E-26 |
| SLCO4C1   | ENSG00000173930 | solute carrier organic anion transporter family member 4C1                 | 11.06 | 7.09E-26 |
| DNHD1     | ENSG00000179532 | dynein heavy chain domain 1                                                | 3.61  | 7.82E-26 |
| LANCL2    | ENSG00000132434 | LanC like 2                                                                | -2.20 | 8.01E-26 |
| LINC00842 |                 |                                                                            | -2.60 | 9.06E-26 |
| TBC1D20   | ENSG00000125875 | TBC1 domain family member 20                                               | 2.02  | 9.91E-26 |
| NOX4      | ENSG00000086991 | NADPH oxidase 4                                                            | -2.45 | 1.20E-25 |
| RNF19B    | ENSG00000116514 | ring finger protein 19B                                                    | 2.16  | 1.58E-25 |
| MICAL2    | ENSG00000133816 | microtubule associated monooxygenase, calponin and LIM domain containing 2 | 2.10  | 1.61E-25 |
| SH2B3     | ENSG00000111252 | SH2B adaptor protein 3                                                     | 2.40  | 1.71E-25 |
| MGLL      | ENSG00000074416 | monoglyceride lipase                                                       | 2.58  | 1.72E-25 |
| MAP3K5    | ENSG00000197442 | mitogen-activated protein kinase kinase kinase 5                           | 2.92  | 1.75E-25 |
| CAT       | ENSG00000121691 | catalase                                                                   | -2.07 | 2.20E-25 |

|          |                 |                                                                                                            |       |          |
|----------|-----------------|------------------------------------------------------------------------------------------------------------|-------|----------|
| MTHFD2   | ENSG00000065911 | methylenetetrahydrofolate dehydrogenase<br>(NADP+ dependent) 2, methenyltetrahydrofolate<br>cyclohydrolase | 2.09  | 2.67E-25 |
| TARS     | ENSG00000113407 | threonyl-tRNA synthetase                                                                                   | 2.16  | 2.67E-25 |
| FEM1C    | ENSG00000145780 | fem-1 homolog C                                                                                            | 2.48  | 3.20E-25 |
| NR2F1    | ENSG00000175745 | nuclear receptor subfamily 2 group F member 1                                                              | -2.10 | 3.20E-25 |
| FAT4     | ENSG00000196159 | FAT atypical cadherin 4                                                                                    | -2.24 | 5.49E-25 |
| HSPA9    | ENSG00000113013 | heat shock protein family A (Hsp70) member 9                                                               | 2.02  | 5.78E-25 |
| SNTB1    | ENSG00000172164 | syntrophin beta 1                                                                                          | 2.23  | 6.23E-25 |
| SLC4A4   | ENSG00000080493 | solute carrier family 4 member 4                                                                           | -2.25 | 7.76E-25 |
| TSPYL4   | ENSG00000187189 | TSPY-like 4                                                                                                | -2.18 | 8.34E-25 |
| KIAA1715 | ENSG00000144320 | KIAA1715                                                                                                   | 2.25  | 9.07E-25 |
| CALR     | ENSG00000179218 | calreticulin                                                                                               | 2.01  | 1.08E-24 |
| DOCK4    | ENSG00000128512 | dedicator of cytokinesis 4                                                                                 | -3.04 | 1.12E-24 |
| SPRED1   | ENSG00000166068 | sprouty related EVH1 domain containing 1                                                                   | 2.34  | 1.45E-24 |

|          |                 |                                                                  |       |          |
|----------|-----------------|------------------------------------------------------------------|-------|----------|
| GBGT1    | ENSG00000148288 | globoside alpha-1,3-N-<br>acetylgalactosaminyltransferase 1      | -3.77 | 1.57E-24 |
| EIF4EBP1 | ENSG00000187840 | eukaryotic translation initiation factor 4E binding<br>protein 1 | 2.29  | 1.59E-24 |
| UBASH3B  | ENSG00000154127 | ubiquitin associated and SH3 domain containing<br>B              | 2.07  | 2.68E-24 |
| TOX      | ENSG00000198846 | thymocyte selection associated high mobility<br>group box        | -2.20 | 2.82E-24 |
| CXCL8    | ENSG00000169429 | C-X-C motif chemokine ligand 8                                   | 4.13  | 4.26E-24 |
| NUPL1    | ENSG00000139496 | nucleoporin 58                                                   | 2.08  | 4.26E-24 |
| FZD2     | ENSG00000180340 | frizzled class receptor 2                                        | -2.86 | 7.04E-24 |
| IL7R     | ENSG00000168685 | interleukin 7 receptor                                           | 2.26  | 7.52E-24 |
| WDR5B    | ENSG00000196981 | WD repeat domain 5B                                              | -3.34 | 8.59E-24 |
| IL4R     | ENSG00000077238 | interleukin 4 receptor                                           | 2.78  | 1.03E-23 |
| PIK3R3   | ENSG00000117461 | phosphoinositide-3-kinase regulatory subunit 3                   | -2.30 | 1.22E-23 |
| ACKR3    | ENSG00000144476 | atypical chemokine receptor 3                                    | -2.44 | 1.24E-23 |



|           |                 |                                                       |        |          |
|-----------|-----------------|-------------------------------------------------------|--------|----------|
| TRAM1L1   | ENSG00000174599 | translocation associated membrane protein 1-like<br>1 | -5.63  | 1.24E-23 |
| MITF      | ENSG00000187098 | melanogenesis associated transcription factor         | -2.20  | 1.49E-23 |
| ARSJ      | ENSG00000180801 | arylsulfatase family member J                         | 2.59   | 2.11E-23 |
| LINC00639 | ENSG00000259070 | long intergenic non-protein coding RNA 639            | -3.25  | 2.34E-23 |
| IFNB1     | ENSG00000171855 | interferon beta 1                                     | 245.34 | 2.76E-23 |
| ZC3H12C   | ENSG00000149289 | zinc finger CCCH-type containing 12C                  | 2.12   | 3.97E-23 |
| GOLGA8A   | ENSG00000175265 | golgin A8 family member A                             | 2.04   | 4.84E-23 |
| HES1      | ENSG00000114315 | hes family bHLH transcription factor 1                | -3.21  | 5.23E-23 |
| BDH2      | ENSG00000164039 | 3-hydroxybutyrate dehydrogenase, type 2               | -2.15  | 5.25E-23 |
| FSHR      | ENSG00000170820 | follicle stimulating hormone receptor                 | -5.36  | 6.82E-23 |
| INSIG2    | ENSG00000125629 | insulin induced gene 2                                | 2.49   | 7.16E-23 |
| PPP2R2B   | ENSG00000156475 | protein phosphatase 2 regulatory subunit Bbeta        | -2.40  | 1.01E-22 |
| SMAD6     | ENSG00000137834 | SMAD family member 6                                  | -3.44  | 1.56E-22 |
| PRSS53    | ENSG00000151006 | protease, serine 53                                   | 3.40   | 1.57E-22 |
| IDI1      | ENSG00000067064 | isopentenyl-diphosphate delta isomerase 1             | 2.19   | 1.64E-22 |

|         |                 |                                                        |       |          |
|---------|-----------------|--------------------------------------------------------|-------|----------|
| PTPDC1  | ENSG00000158079 | protein tyrosine phosphatase domain containing 1       | 2.49  | 1.72E-22 |
| AEN     | ENSG00000181026 | apoptosis enhancing nuclease                           | 2.23  | 2.45E-22 |
| ARSI    | ENSG00000183876 | arylsulfatase family member I                          | -2.58 | 2.46E-22 |
| ZBTB21  | ENSG00000173276 | zinc finger and BTB domain containing 21               | 2.27  | 2.52E-22 |
| ANGPTL4 | ENSG00000167772 | angiopoietin like 4                                    | 9.20  | 2.71E-22 |
| LRIG3   | ENSG00000139263 | leucine rich repeats and immunoglobulin like domains 3 | -2.12 | 2.88E-22 |
| CRYBG3  | ENSG00000080200 | crystallin beta-gamma domain containing 3              | 2.28  | 3.97E-22 |
| PLEKHA8 | ENSG00000106086 | pleckstrin homology domain containing A8               | 2.15  | 4.16E-22 |
| TIMP3   | ENSG00000100234 | TIMP metalloproteinase inhibitor 3                     | -2.04 | 4.18E-22 |
| SC5D    | ENSG00000109929 | sterol-C5-desaturase                                   | 2.16  | 4.56E-22 |
| TMEM45A | ENSG00000181458 | transmembrane protein 45A                              | 2.55  | 4.69E-22 |
| HCP5    | ENSG00000206337 | HLA complex P5 (non-protein coding)                    | -2.55 | 4.84E-22 |
| MSMO1   | ENSG00000052802 | methylsterol monooxygenase 1                           | 2.01  | 5.03E-22 |
| VIM-AS1 | ENSG00000229124 | VIM antisense RNA 1                                    | 2.58  | 5.13E-22 |
| ACACB   | ENSG00000076555 | acetyl-CoA carboxylase beta                            | -2.60 | 7.43E-22 |

|           |                 |                                            |       |          |
|-----------|-----------------|--------------------------------------------|-------|----------|
| SYTL5     | ENSG00000147041 | synaptotagmin like 5                       | -2.77 | 8.33E-22 |
| FCHO1     | ENSG00000130475 | FCH domain only 1                          | -4.27 | 9.16E-22 |
| DUSP1     | ENSG00000120129 | dual specificity phosphatase 1             | 2.30  | 1.09E-21 |
| SLFN5     | ENSG00000166750 | schlafen family member 5                   | 2.05  | 1.09E-21 |
| Mar-04    | ENSG00000144583 | membrane associated ring-CH-type finger 4  | 2.61  | 1.37E-21 |
| SPRED3    | ENSG00000188766 | sprouty related EVH1 domain containing 3   | 3.28  | 1.37E-21 |
| C17orf96  | ENSG00000273604 | chromosome 17 open reading frame 96        | 3.14  | 1.44E-21 |
| GATSL2    | ENSG00000274070 | GATS protein-like 2                        | -2.30 | 1.44E-21 |
| ITGB3     | ENSG00000259207 | integrin subunit beta 3                    | 2.51  | 1.45E-21 |
| LINC00982 | ENSG00000177133 | long intergenic non-protein coding RNA 982 | -2.68 | 1.55E-21 |
| PBX1      | ENSG00000185630 | PBX homeobox 1                             | -2.15 | 1.77E-21 |
| PDCD1LG2  | ENSG00000197646 | programmed cell death 1 ligand 2           | 3.11  | 1.78E-21 |
| SLC6A15   | ENSG00000072041 | solute carrier family 6 member 15          | 2.05  | 2.14E-21 |
| C11orf71  | ENSG00000180425 | chromosome 11 open reading frame 71        | -2.99 | 2.23E-21 |
| BIRC3     | ENSG00000023445 | baculoviral IAP repeat containing 3        | 2.94  | 2.25E-21 |
| XIAP      | ENSG00000101966 | X-linked inhibitor of apoptosis            | 2.02  | 2.42E-21 |

|              |                 |                                                           |       |          |
|--------------|-----------------|-----------------------------------------------------------|-------|----------|
| KCTD12       | ENSG00000178695 | potassium channel tetramerization domain<br>containing 12 | 3.01  | 2.54E-21 |
| DKK1         | ENSG00000107984 | dickkopf WNT signaling pathway inhibitor 1                | -2.05 | 2.85E-21 |
| ZNF470       | ENSG00000197016 | zinc finger protein 470                                   | 2.56  | 3.05E-21 |
| CCDC148      | ENSG00000153237 | coiled-coil domain containing 148                         | 2.54  | 3.38E-21 |
| LOC101928516 |                 |                                                           | 74.01 | 3.38E-21 |
| ANOS1        | ENSG00000011201 | anosmin 1                                                 | -2.20 | 4.49E-21 |
| CBL          | ENSG00000110395 | Cbl proto-oncogene                                        | 2.13  | 4.95E-21 |
| ANKZF1       | ENSG00000163516 | ankyrin repeat and zinc finger domain containing<br>1     | 2.12  | 5.43E-21 |
| PLK3         | ENSG00000173846 | polo like kinase 3                                        | 2.26  | 5.71E-21 |
| ACTN2        | ENSG00000077522 | actinin alpha 2                                           | 5.37  | 7.27E-21 |
| ADAMTS9-AS2  | ENSG00000241684 | ADAMTS9 antisense RNA 2                                   | 4.30  | 7.27E-21 |
| HS3ST3B1     | ENSG00000125430 | heparan sulfate-glucosamine 3-sulfotransferase<br>3B1     | 2.14  | 7.81E-21 |
| ARNT2        | ENSG00000172379 | aryl hydrocarbon receptor nuclear translocator 2          | -2.04 | 8.65E-21 |

|           |                 |                                              |       |          |
|-----------|-----------------|----------------------------------------------|-------|----------|
| PPAPDC2   | ENSG00000205808 | phospholipid phosphatase 6                   | -2.46 | 9.00E-21 |
| APCDD1    | ENSG00000154856 | adenomatosis polyposis coli down-regulated 1 | -8.43 | 9.38E-21 |
| CTH       | ENSG00000116761 | cystathionine gamma-lyase                    | 3.04  | 1.12E-20 |
| LONP1     | ENSG00000196365 | lon peptidase 1, mitochondrial               | 2.45  | 1.41E-20 |
| PSMD6-AS2 | ENSG00000239653 | PSMD6 antisense RNA 2                        | 2.77  | 1.82E-20 |
| PCDH1     | ENSG00000156453 | protocadherin 1                              | 2.31  | 1.90E-20 |
| LGALS1    | ENSG00000119862 | galectin like                                | 2.42  | 1.96E-20 |
| METTL7A   | ENSG00000185432 | methyltransferase like 7A                    | -4.01 | 2.13E-20 |
| SH3PXD2A  | ENSG00000107957 | SH3 and PX domains 2A                        | 3.17  | 3.65E-20 |
| CRYBB2P1  | ENSG00000100058 | crystallin beta B2 pseudogene 1              | 2.22  | 4.25E-20 |
| SLC36A1   | ENSG00000123643 | solute carrier family 36 member 1            | 2.34  | 4.49E-20 |
| KIF21B    | ENSG00000116852 | kinesin family member 21B                    | 6.37  | 5.68E-20 |
| GTF2A1    | ENSG00000165417 | general transcription factor IIA subunit 1   | 2.19  | 5.68E-20 |
| MEGF9     | ENSG00000106780 | multiple EGF like domains 9                  | -2.03 | 5.91E-20 |
| MINA      | ENSG00000170854 | MYC induced nuclear antigen                  | 2.07  | 6.34E-20 |
| FOXD1     | ENSG00000251493 | forkhead box D1                              | 2.01  | 7.14E-20 |

|          |                 |                                                        |       |          |
|----------|-----------------|--------------------------------------------------------|-------|----------|
| USP36    | ENSG00000055483 | ubiquitin specific peptidase 36                        | 2.16  | 7.21E-20 |
| MFHAS1   | ENSG00000147324 | malignant fibrous histiocytoma amplified<br>sequence 1 | 2.06  | 8.72E-20 |
| TAF9B    | ENSG00000187325 | TATA-box binding protein associated factor 9b          | -2.53 | 9.35E-20 |
| TYRP1    | ENSG00000107165 | tyrosinase related protein 1                           | -5.37 | 1.22E-19 |
| C10orf12 | ENSG00000155640 | chromosome 10 open reading frame 12                    | 2.13  | 1.68E-19 |
| RASL11B  | ENSG00000128045 | RAS like family 11 member B                            | -9.55 | 1.75E-19 |
| WIPI1    | ENSG00000070540 | WD repeat domain, phosphoinositide interacting 1       | 2.01  | 1.78E-19 |
| SLC22A14 | ENSG00000144671 | solute carrier family 22 member 14                     | 11.15 | 1.83E-19 |
| PHLDA2   | ENSG00000181649 | pleckstrin homology like domain family A member<br>2   | 4.59  | 1.84E-19 |
| SOWAHC   | ENSG00000198142 | sosondowah ankyrin repeat domain family<br>member C    | 2.19  | 1.88E-19 |
| SLC7A1   | ENSG00000139514 | solute carrier family 7 member 1                       | 2.24  | 1.96E-19 |
| METTL21B | ENSG00000123427 | methyltransferase like 21B                             | 2.10  | 1.98E-19 |
| PLAGL1   | ENSG00000118495 | PLAG1 like zinc finger 1                               | 2.48  | 2.18E-19 |

|           |                 |                                                      |       |          |
|-----------|-----------------|------------------------------------------------------|-------|----------|
| MSS51     | ENSG00000166343 | MSS51 mitochondrial translational activator          | 2.83  | 2.41E-19 |
| PPP2R5B   | ENSG00000068971 | protein phosphatase 2 regulatory subunit B'beta      | 2.55  | 2.49E-19 |
| CDCP1     | ENSG00000163814 | CUB domain containing protein 1                      | 2.22  | 2.73E-19 |
| HSD17B7   | ENSG00000132196 | hydroxysteroid 17-beta dehydrogenase 7               | 2.20  | 2.83E-19 |
| OR51E2    | ENSG00000167332 | olfactory receptor family 51 subfamily E member<br>2 | -3.48 | 2.93E-19 |
| TMEM151A  | ENSG00000179292 | transmembrane protein 151A                           | -2.79 | 3.24E-19 |
| DBP       | ENSG00000105516 | D-box binding PAR bZIP transcription factor          | -2.86 | 3.48E-19 |
| SLC25A32  | ENSG00000164933 | solute carrier family 25 member 32                   | 2.04  | 4.05E-19 |
| LINC01128 | ENSG00000228794 | long intergenic non-protein coding RNA 1128          | 2.36  | 4.49E-19 |
| CSDC2     | ENSG00000172346 | cold shock domain containing C2                      | -2.92 | 5.55E-19 |
| DPYSL4    | ENSG00000151640 | dihydropyrimidinase like 4                           | 2.11  | 6.66E-19 |
| GBP2      | ENSG00000162645 | guanylate binding protein 2                          | -3.45 | 7.03E-19 |
| HSPA6     | ENSG00000173110 | heat shock protein family A (Hsp70) member 6         | 10.21 | 8.39E-19 |
| ARFGEF3   | ENSG00000112379 | ARFGEF family member 3                               | 2.09  | 8.73E-19 |
| LOC400940 |                 |                                                      | -3.77 | 9.00E-19 |

|          |                 |                                                             |       |          |
|----------|-----------------|-------------------------------------------------------------|-------|----------|
| HS3ST3A1 | ENSG00000153976 | heparan sulfate-glucosamine 3-sulfotransferase<br>3A1       | 2.07  | 1.18E-18 |
| GALNT5   | ENSG00000136542 | polypeptide N-acetylgalactosaminyltransferase 5             | -2.28 | 1.19E-18 |
| CRISPLD2 | ENSG00000103196 | cysteine rich secretory protein LCCL domain<br>containing 2 | -5.85 | 1.24E-18 |
| PALM2    | ENSG00000243444 | paralemmin 2                                                | 3.99  | 1.33E-18 |
| LXN      | ENSG00000079257 | latexin                                                     | -2.28 | 1.52E-18 |
| PEX5L    | ENSG00000114757 | peroxisomal biogenesis factor 5-like                        | -2.37 | 1.66E-18 |
| JPH2     | ENSG00000149596 | junctionophilin 2                                           | -2.65 | 1.94E-18 |
| KBTBD8   | ENSG00000163376 | kelch repeat and BTB domain containing 8                    | 3.21  | 1.98E-18 |
| KRT33B   | ENSG00000131738 | keratin 33B                                                 | -2.24 | 2.61E-18 |
| ARHGEF26 | ENSG00000277101 | Rho guanine nucleotide exchange factor 26                   | -2.01 | 2.82E-18 |
| PKI55    | ENSG00000260804 | DKFZp434H1419                                               | -2.33 | 2.90E-18 |
| GPRC5A   | ENSG00000013588 | G protein-coupled receptor class C group 5<br>member A      | -2.10 | 3.53E-18 |
| ZNF584   | ENSG00000171574 | zinc finger protein 584                                     | 2.18  | 3.72E-18 |



|           |                  |                                                                  |       |          |
|-----------|------------------|------------------------------------------------------------------|-------|----------|
| KCNG1     | ENSG00000026559  | potassium voltage-gated channel modifier<br>subfamily G member 1 | 8.06  | 4.42E-18 |
| ANXA8L1   | ENSG000000264230 | annexin A8-like 1                                                | -3.35 | 4.57E-18 |
| RNMT      | ENSG000000101654 | RNA guanine-7 methyltransferase                                  | 2.02  | 4.83E-18 |
| ADM       | ENSG000000148926 | adrenomedullin                                                   | 2.07  | 4.86E-18 |
| PDGFD     | ENSG000000170962 | platelet derived growth factor D                                 | -2.50 | 4.96E-18 |
| HLA-L     | ENSG000000242227 | major histocompatibility complex, class I, L<br>(pseudogene)     | 3.74  | 5.14E-18 |
| LOC154761 |                  |                                                                  | 2.45  | 7.68E-18 |
| IPMK      | ENSG000000151151 | inositol polyphosphate multikinase                               | 2.59  | 8.04E-18 |
| CCDC58    | ENSG000000160124 | coiled-coil domain containing 58                                 | 2.31  | 8.04E-18 |
| MIR155HG  | ENSG000000234883 | MIR155 host gene                                                 | 3.67  | 8.55E-18 |
| MAN1A1    | ENSG000000111885 | mannosidase alpha class 1A member 1                              | -2.07 | 8.57E-18 |
| TMEM139   | ENSG000000178826 | transmembrane protein 139                                        | -2.70 | 9.82E-18 |
| SYNPO     | ENSG000000171992 | synaptopodin                                                     | -2.95 | 9.84E-18 |
| UCN2      | ENSG000000145040 | urocortin 2                                                      | 4.87  | 9.99E-18 |

|        |                 |                                           |       |          |
|--------|-----------------|-------------------------------------------|-------|----------|
| SRGAP1 | ENSG00000196935 | SLIT-ROBO Rho GTPase activating protein 1 | 2.42  | 1.06E-17 |
| AKR1C3 | ENSG00000196139 | aldo-keto reductase family 1 member C3    | -2.36 | 1.21E-17 |
| EFR3B  | ENSG00000084710 | EFR3 homolog B                            | -2.12 | 1.27E-17 |
| EFNA3  | ENSG00000143590 | ephrin A3                                 | 2.53  | 1.39E-17 |
| DNAH7  | ENSG00000118997 | dynein axonemal heavy chain 7             | -3.15 | 1.47E-17 |
| SPHK1  | ENSG00000176170 | sphingosine kinase 1                      | 2.72  | 1.60E-17 |
| PKD1L2 | ENSG00000166473 | polycystin 1 like 2 (gene/pseudogene)     | -2.04 | 1.61E-17 |
| MMP28  | ENSG00000271447 | matrix metalloproteinase 28               | -5.25 | 1.72E-17 |
| TBC1D2 | ENSG00000095383 | TBC1 domain family member 2               | -2.32 | 1.81E-17 |
| NAMPT  | ENSG00000105835 | nicotinamide phosphoribosyltransferase    | 2.15  | 1.83E-17 |
| ERO1B  | ENSG00000086619 | endoplasmic reticulum oxidoreductase beta | 2.19  | 1.85E-17 |
| TTC30B | ENSG00000196659 | tetratricopeptide repeat domain 30B       | -2.38 | 1.94E-17 |
| BEX2   | ENSG00000133134 | brain expressed X-linked 2                | 2.09  | 3.13E-17 |
| CDYL2  | ENSG00000166446 | chromodomain protein, Y-like 2            | 2.07  | 3.32E-17 |
| CXXC5  | ENSG00000171604 | CXXC finger protein 5                     | -2.01 | 3.37E-17 |

|           |                 |                                                      |       |          |
|-----------|-----------------|------------------------------------------------------|-------|----------|
| ZDHC8P1   | ENSG00000133519 | zinc finger DHHC-type containing 8 pseudogene<br>1   | -2.36 | 3.43E-17 |
| TGFB3     | ENSG00000119699 | transforming growth factor beta 3                    | -3.21 | 3.51E-17 |
| CRELD1    | ENSG00000163703 | cysteine rich with EGF like domains 1                | 2.15  | 3.52E-17 |
| TSPAN10   | ENSG00000182612 | tetraspanin 10                                       | -2.78 | 4.47E-17 |
| SPRED2    | ENSG00000198369 | sprouty related EVH1 domain containing 2             | 2.26  | 4.91E-17 |
| SLC26A6   | ENSG00000225697 | solute carrier family 26 member 6                    | 2.23  | 5.30E-17 |
| EFCAB3    | ENSG00000172421 | EF-hand calcium binding domain 3                     | 5.49  | 5.75E-17 |
| LOC284344 |                 |                                                      | 4.53  | 6.09E-17 |
| HIST1H1C  | ENSG00000187837 | histone cluster 1, H1c                               | -2.04 | 6.18E-17 |
| USP53     | ENSG00000145390 | ubiquitin specific peptidase 53                      | 2.06  | 6.25E-17 |
| TLR1      | ENSG00000174125 | toll like receptor 1                                 | -2.54 | 6.41E-17 |
| GLS       | ENSG00000115419 | glutaminase                                          | -2.03 | 6.58E-17 |
| HSPA4L    | ENSG00000164070 | heat shock protein family A (Hsp70) member 4<br>like | 2.02  | 6.60E-17 |
| ZNF131    | ENSG00000172262 | zinc finger protein 131                              | 2.02  | 6.68E-17 |

|           |                 |                                                                          |       |          |
|-----------|-----------------|--------------------------------------------------------------------------|-------|----------|
| RAB17     | ENSG00000124839 | RAB17, member RAS oncogene family                                        | -3.16 | 7.23E-17 |
| SP140     | ENSG00000079263 | SP140 nuclear body protein                                               | 2.72  | 7.48E-17 |
| SLCO4A1   | ENSG00000101187 | solute carrier organic anion transporter family<br>member 4A1            | 3.45  | 8.16E-17 |
| DUSP8     | ENSG00000278165 | dual specificity phosphatase 8                                           | 2.86  | 9.54E-17 |
| FLJ42627  |                 |                                                                          | 2.54  | 1.00E-16 |
| C17orf67  | ENSG00000214226 | chromosome 17 open reading frame 67                                      | 3.58  | 1.07E-16 |
| ZNF488    | ENSG00000265763 | zinc finger protein 488                                                  | -3.18 | 1.23E-16 |
| SDF2L1    | ENSG00000128228 | stromal cell derived factor 2 like 1                                     | 2.84  | 1.75E-16 |
| TNFRSF10A | ENSG00000104689 | tumor necrosis factor receptor superfamily<br>member 10a                 | 2.16  | 1.80E-16 |
| RELB      | ENSG00000104856 | RELB proto-oncogene, NF-kB subunit                                       | 3.51  | 1.81E-16 |
| ALPK3     | ENSG00000136383 | alpha kinase 3                                                           | 5.55  | 1.96E-16 |
| GRB7      | ENSG00000141738 | growth factor receptor bound protein 7                                   | -2.40 | 2.34E-16 |
| TANC2     | ENSG00000170921 | tetratricopeptide repeat, ankyrin repeat and<br>coiled-coil containing 2 | 2.08  | 2.68E-16 |

|          |                 |                                                                        |       |          |
|----------|-----------------|------------------------------------------------------------------------|-------|----------|
| SPATA12  | ENSG00000186451 | spermatogenesis associated 12                                          | -4.28 | 2.75E-16 |
| ATOH8    | ENSG00000168874 | atonal bHLH transcription factor 8                                     | -2.60 | 3.00E-16 |
| IER2     | ENSG00000160888 | immediate early response 2                                             | 2.13  | 3.06E-16 |
| RPRM     | ENSG00000177519 | reprimo, TP53 dependent G2 arrest mediator<br>candidate                | -2.87 | 3.15E-16 |
| TRIM36   | ENSG00000152503 | tripartite motif containing 36                                         | 2.61  | 3.54E-16 |
| MMP15    | ENSG00000102996 | matrix metalloproteinase 15<br>reactive intermediate imine deaminase A | -2.31 | 3.63E-16 |
| HRSP12   | ENSG00000132541 | homolog                                                                | -2.22 | 3.91E-16 |
| PAPD7    | ENSG00000112941 | PAP associated domain containing 7                                     | 2.07  | 3.95E-16 |
| KCNH3    | ENSG00000135519 | potassium voltage-gated channel subfamily H<br>member 3                | -3.67 | 4.02E-16 |
| C14orf37 | ENSG00000139971 | chromosome 14 open reading frame 37                                    | -2.16 | 5.42E-16 |
| MAFG     | ENSG00000197063 | MAF bZIP transcription factor G                                        | 2.10  | 5.51E-16 |
| KMO      | ENSG00000117009 | kynurenine 3-monooxygenase                                             | -5.41 | 6.98E-16 |
| DUSP6    | ENSG00000139318 | dual specificity phosphatase 6                                         | 2.38  | 7.10E-16 |

|              |                 |                                              |       |          |
|--------------|-----------------|----------------------------------------------|-------|----------|
| TGM1         | ENSG00000092295 | transglutaminase 1                           | -2.49 | 8.95E-16 |
| TRIM9        | ENSG00000100505 | tripartite motif containing 9                | 4.63  | 9.17E-16 |
| ADCYAP1      | ENSG00000141433 | adenylate cyclase activating polypeptide 1   | -2.01 | 1.36E-15 |
| RELT         | ENSG00000054967 | RELT tumor necrosis factor receptor          | 2.77  | 1.55E-15 |
| MEF2C        | ENSG00000081189 | myocyte enhancer factor 2C                   | -3.06 | 1.57E-15 |
| LOC100126784 |                 |                                              | 2.05  | 1.60E-15 |
| LINC01125    | ENSG00000228486 | long intergenic non-protein coding RNA 1125  | 3.24  | 1.60E-15 |
| ZEB1         | ENSG00000148516 | zinc finger E-box binding homeobox 1         | 2.09  | 1.70E-15 |
| PPAP2B       | ENSG00000162407 | phospholipid phosphatase 3                   | -2.55 | 1.73E-15 |
| WFS1         | ENSG00000109501 | wolframin ER transmembrane glycoprotein      | -2.33 | 1.75E-15 |
| ZFAND2A      | ENSG00000178381 | zinc finger AN1-type containing 2A           | 2.57  | 1.84E-15 |
| SLC47A1      | ENSG00000142494 | solute carrier family 47 member 1            | -3.20 | 2.18E-15 |
| HSPB2        | ENSG00000170276 | heat shock protein family B (small) member 2 | -2.35 | 2.19E-15 |
| FICD         | ENSG00000198855 | FIC domain containing                        | 2.66  | 3.23E-15 |
| FAM184B      | ENSG00000047662 | family with sequence similarity 184 member B | 4.94  | 3.24E-15 |
| SLC9A9       | ENSG00000181804 | solute carrier family 9 member A9            | -2.64 | 3.50E-15 |

|              |                 |                                                                     |       |          |
|--------------|-----------------|---------------------------------------------------------------------|-------|----------|
| POLR2A       | ENSG00000181222 | polymerase (RNA) II subunit A                                       | 2.36  | 3.75E-15 |
| BDKRB1       | ENSG00000100739 | bradykinin receptor B1                                              | -2.82 | 4.75E-15 |
| BTD          | ENSG00000169814 | biotinidase                                                         | -2.01 | 5.55E-15 |
| EEPD1        | ENSG00000122547 | endonuclease/exonuclease/phosphatase family<br>domain containing 1  | -2.57 | 5.87E-15 |
| ANXA8        | ENSG00000265190 | annexin A8                                                          | -2.84 | 6.37E-15 |
| LOC101927040 |                 |                                                                     | 10.14 | 6.42E-15 |
| LOC101928738 |                 |                                                                     | -6.49 | 6.65E-15 |
| TRPM3        | ENSG00000083067 | transient receptor potential cation channel<br>subfamily M member 3 | -5.29 | 6.76E-15 |
| KSR1         | ENSG00000141068 | kinase suppressor of ras 1                                          | 2.46  | 6.76E-15 |
| ALS2CR12     | ENSG00000155749 | amyotrophic lateral sclerosis 2 chromosome<br>region candidate 12   | 3.78  | 6.81E-15 |
| TKT          | ENSG00000163931 | transketolase                                                       | -2.30 | 7.13E-15 |
| METTL1       | ENSG00000037897 | methyltransferase like 1                                            | 2.11  | 7.90E-15 |
| ARL14        | ENSG00000179674 | ADP ribosylation factor like GTPase 14                              | -4.76 | 7.90E-15 |

|          |                 |                                                               |       |          |
|----------|-----------------|---------------------------------------------------------------|-------|----------|
| NRAV     | ENSG00000248008 | negative regulator of antiviral response (non-protein coding) | 2.02  | 9.06E-15 |
| IL11     | ENSG00000095752 | interleukin 11                                                | 3.34  | 9.67E-15 |
| NFKBIE   | ENSG00000146232 | NFKB inhibitor epsilon                                        | 2.19  | 1.04E-14 |
| SLC9A1   | ENSG00000090020 | solute carrier family 9 member A1                             | 2.32  | 1.06E-14 |
| PDE1A    | ENSG00000115252 | phosphodiesterase 1A                                          | -3.62 | 1.14E-14 |
| GAS2L3   | ENSG00000139354 | growth arrest specific 2 like 3                               | 2.04  | 1.14E-14 |
| AAK1     | ENSG00000115977 | AP2 associated kinase 1                                       | 2.23  | 1.23E-14 |
| FLJ42969 | ENSG00000248599 | uncharacterized LOC441374                                     | -4.19 | 1.36E-14 |
| BACH2    | ENSG00000112182 | BTB domain and CNC homolog 2                                  | 2.92  | 1.50E-14 |
| SLC22A13 | ENSG00000172940 | solute carrier family 22 member 13                            | 5.14  | 1.55E-14 |
| CDH18    | ENSG00000145526 | cadherin 18                                                   | -6.83 | 1.68E-14 |
| KLHL31   | ENSG00000124743 | kelch like family member 31                                   | -2.24 | 1.86E-14 |
| LRRC8C   | ENSG00000171488 | leucine rich repeat containing 8 family member C              | 2.40  | 1.96E-14 |
| QRICH2   | ENSG00000129646 | glutamine rich 2                                              | 2.62  | 2.26E-14 |
| SERTAD2  | ENSG00000179833 | SERTA domain containing 2                                     | 2.04  | 2.59E-14 |



|           |                 |                                                   |       |          |
|-----------|-----------------|---------------------------------------------------|-------|----------|
| MARK1     | ENSG00000116141 | microtubule affinity regulating kinase 1          | 2.18  | 2.95E-14 |
| C14orf93  | ENSG00000100802 | chromosome 14 open reading frame 93               | -2.63 | 3.02E-14 |
| MYLIP     | ENSG00000007944 | myosin regulatory light chain interacting protein | -2.79 | 3.02E-14 |
| CRB2      | ENSG00000148204 | crumbs 2, cell polarity complex component         | -2.80 | 3.51E-14 |
| KIAA1107  | ENSG00000069712 | KIAA1107                                          | -2.33 | 3.75E-14 |
| CNR1      | ENSG00000118432 | cannabinoid receptor 1 (brain)                    | -2.36 | 3.76E-14 |
| UNC13D    | ENSG00000092929 | unc-13 homolog D                                  | -2.21 | 4.43E-14 |
| PBXIP1    | ENSG00000163346 | PBX homeobox interacting protein 1                | -2.01 | 4.51E-14 |
| DOK3      | ENSG00000146094 | docking protein 3                                 | 3.39  | 4.81E-14 |
| LOC652276 |                 |                                                   | 2.51  | 4.99E-14 |
| PTPN6     | ENSG00000111679 | protein tyrosine phosphatase, non-receptor type 6 | -2.26 | 5.24E-14 |
| WNT2B     | ENSG00000134245 | Wnt family member 2B                              | -2.19 | 5.75E-14 |
| CAMTA2    | ENSG00000108509 | calmodulin binding transcription activator 2      | 2.08  | 5.96E-14 |
| TRAF5     | ENSG00000082512 | TNF receptor associated factor 5                  | 2.33  | 6.42E-14 |
| UNC5B     | ENSG00000107731 | unc-5 netrin receptor B                           | -2.95 | 7.07E-14 |
| KIFC3     | ENSG00000140859 | kinesin family member C3                          | 2.06  | 7.21E-14 |

|            |                 |                                                                 |       |          |
|------------|-----------------|-----------------------------------------------------------------|-------|----------|
| RORC       | ENSG00000143365 | RAR related orphan receptor C                                   | -3.04 | 7.94E-14 |
| ITGB4      | ENSG00000132470 | integrin subunit beta 4                                         | -2.39 | 7.95E-14 |
| OSGIN1     | ENSG00000140961 | oxidative stress induced growth inhibitor 1                     | 2.63  | 9.58E-14 |
| FLT3       | ENSG00000122025 | fms related tyrosine kinase 3                                   | -2.05 | 9.80E-14 |
| ARRDC2     | ENSG00000105643 | arrestin domain containing 2                                    | 2.01  | 9.82E-14 |
| CRELD2     | ENSG00000184164 | cysteine rich with EGF like domains 2                           | 2.52  | 9.96E-14 |
| C4orf47    | ENSG00000205129 | chromosome 4 open reading frame 47                              | 3.08  | 1.09E-13 |
| RAB20      | ENSG00000139832 | RAB20, member RAS oncogene family                               | 2.78  | 1.18E-13 |
| TPRN       | ENSG00000176058 | taperin                                                         | -2.37 | 1.24E-13 |
| EPHA3      | ENSG00000044524 | EPH receptor A3                                                 | 2.24  | 1.46E-13 |
| ETV4       | ENSG00000175832 | ETS variant 4                                                   | 4.98  | 1.56E-13 |
| ISG20      | ENSG00000172183 | interferon stimulated exonuclease gene 20                       | 3.07  | 1.61E-13 |
| HERC5      | ENSG00000138646 | HECT and RLD domain containing E3 ubiquitin<br>protein ligase 5 | 2.93  | 1.64E-13 |
| PDK4       | ENSG00000004799 | pyruvate dehydrogenase kinase 4                                 | -2.53 | 1.70E-13 |
| PARD6G-AS1 | ENSG00000267270 | PARD6G antisense RNA 1                                          | 3.44  | 1.81E-13 |

|              |                 |                                                        |       |          |
|--------------|-----------------|--------------------------------------------------------|-------|----------|
| LOC100133091 |                 |                                                        | 2.38  | 1.92E-13 |
| TCAF2P1      | ENSG00000159860 | TRPM8 channel associated factor 2 pseudogene<br>1      | 3.23  | 1.95E-13 |
| SBDSP1       | ENSG00000225648 | Shwachman-Bodian-Diamond syndrome<br>pseudogene 1      | 2.12  | 2.00E-13 |
| ERICH2       | ENSG00000204334 | glutamate rich 2                                       | 2.32  | 2.25E-13 |
| ABTB2        | ENSG00000166016 | ankyrin repeat and BTB domain containing 2             | 2.12  | 2.55E-13 |
| SLC25A25     | ENSG00000148339 | solute carrier family 25 member 25                     | 2.08  | 3.04E-13 |
| MCM3AP-AS1   | ENSG00000215424 | MCM3AP antisense RNA 1                                 | 2.06  | 3.09E-13 |
| LNX1         | ENSG00000072201 | ligand of numb-protein X 1                             | -2.29 | 3.13E-13 |
| SPDYA        | ENSG00000163806 | speedy/RINGO cell cycle regulator family<br>member A   | 2.95  | 3.16E-13 |
| LYAR         | ENSG00000145220 | Ly1 antibody reactive                                  | 2.09  | 3.19E-13 |
| MAP1LC3B     | ENSG00000140941 | microtubule associated protein 1 light chain 3<br>beta | 2.24  | 3.29E-13 |

|           |                 |                                                                     |       |          |
|-----------|-----------------|---------------------------------------------------------------------|-------|----------|
| KCTD8     | ENSG00000183783 | potassium channel tetramerization domain<br>containing 8            | -2.17 | 3.43E-13 |
| KCNJ2     | ENSG00000123700 | potassium voltage-gated channel subfamily J<br>member 2             | -2.95 | 3.64E-13 |
| DHRS13    | ENSG00000167536 | dehydrogenase/reductase 13                                          | 3.07  | 4.21E-13 |
| MYO7A     | ENSG00000137474 | myosin VIIA                                                         | -2.46 | 4.58E-13 |
| ZC3HAV1L  | ENSG00000146858 | zinc finger CCCH-type containing, antiviral 1 like                  | 2.15  | 4.80E-13 |
| CNNM1     | ENSG00000119946 | cyclin and CBS domain divalent metal cation<br>transport mediator 1 | 2.21  | 4.92E-13 |
| SNHG19    | ENSG00000260260 | small nucleolar RNA host gene 19                                    | -3.02 | 5.43E-13 |
| FAM83G    | ENSG00000188522 | family with sequence similarity 83 member G                         | 2.03  | 5.83E-13 |
| CYP1A1    | ENSG00000140465 | cytochrome P450 family 1 subfamily A member 1                       | -5.56 | 5.84E-13 |
| FAM86B1   | ENSG00000186523 | family with sequence similarity 86 member B1                        | 2.38  | 5.87E-13 |
| HSD17B7P2 | ENSG00000099251 | hydroxysteroid 17-beta dehydrogenase 7<br>pseudogene 2              | 2.17  | 6.93E-13 |

|            |                 |                                                                                  |       |          |
|------------|-----------------|----------------------------------------------------------------------------------|-------|----------|
| SMG1P7     | ENSG00000261556 | SMG1P7, nonsense mediated mRNA decay associated PI3K related kinase pseudogene 7 | 2.06  | 7.64E-13 |
| Sep-04     | ENSG00000108387 | septin 4                                                                         | -2.02 | 1.06E-12 |
| RAPH1      | ENSG00000173166 | Ras association (RalGDS/AF-6) and pleckstrin homology domains 1                  | 2.77  | 1.12E-12 |
| PBLD       | ENSG00000108187 | phenazine biosynthesis like protein domain containing                            | -2.05 | 1.21E-12 |
| SPNS2      | ENSG00000183018 | sphingolipid transporter 2                                                       | -2.19 | 1.28E-12 |
| C17orf51   | ENSG00000212719 | chromosome 17 open reading frame 51                                              | 2.00  | 1.36E-12 |
| GSTA4      | ENSG00000170899 | glutathione S-transferase alpha 4                                                | -2.10 | 1.84E-12 |
| ERVMER34-1 | ENSG00000226887 | endogenous retrovirus group MER34 member 1                                       | -2.86 | 2.16E-12 |
| CEACAM19   | ENSG00000186567 | carcinoembryonic antigen related cell adhesion molecule 19                       | 2.07  | 2.30E-12 |
| ADGRL3     | ENSG00000150471 | adhesion G protein-coupled receptor L3                                           | -2.16 | 2.44E-12 |
| RAX        | ENSG00000134438 | retina and anterior neural fold homeobox                                         | 2.22  | 2.45E-12 |
| LINC01521  | ENSG00000213888 | long intergenic non-protein coding RNA 1521                                      | -2.28 | 2.59E-12 |

|              |                 |                                               |       |          |
|--------------|-----------------|-----------------------------------------------|-------|----------|
| ALDH3B1      | ENSG00000006534 | aldehyde dehydrogenase 3 family member B1     | -2.17 | 2.69E-12 |
| SLC35G2      | ENSG00000168917 | solute carrier family 35 member G2            | 2.01  | 2.78E-12 |
| LOC100288911 |                 |                                               | -2.34 | 3.43E-12 |
| CELSR3       | ENSG00000008300 | cadherin EGF LAG seven-pass G-type receptor 3 | 2.25  | 4.21E-12 |
| CASC10       | ENSG00000204682 | cancer susceptibility candidate 10            | -2.52 | 4.28E-12 |
| LRRC7        | ENSG00000033122 | leucine rich repeat containing 7              | -2.50 | 4.34E-12 |
| MAPK7        | ENSG00000166484 | mitogen-activated protein kinase 7            | 2.05  | 4.53E-12 |
| NME5         | ENSG00000112981 | NME/NM23 family member 5                      | -2.36 | 4.88E-12 |
| TEC          | ENSG00000135605 | tec protein tyrosine kinase                   | 2.03  | 5.07E-12 |
| CUBN         | ENSG00000107611 | cubilin                                       | 2.19  | 5.53E-12 |
| PQLC3        | ENSG00000162976 | PQ loop repeat containing 3                   | -2.06 | 6.12E-12 |
| FGF11        | ENSG00000161958 | fibroblast growth factor 11                   | 2.70  | 6.38E-12 |
| SORBS2       | ENSG00000154556 | sorbin and SH3 domain containing 2            | -2.79 | 6.65E-12 |
| MMP11        | ENSG00000275365 | matrix metalloproteinase 11                   | -2.56 | 6.77E-12 |
| CSRNP3       | ENSG00000178662 | cysteine and serine rich nuclear protein 3    | -2.53 | 7.04E-12 |
| MB21D1       | ENSG00000164430 | Mab-21 domain containing 1                    | 2.80  | 7.25E-12 |

|          |                 |                                                            |       |          |
|----------|-----------------|------------------------------------------------------------|-------|----------|
| MVD      | ENSG00000167508 | mevalonate diphosphate decarboxylase                       | 2.08  | 7.25E-12 |
| GOLGA6L9 | ENSG00000274320 | golgin A6 family-like 9                                    | 2.03  | 8.08E-12 |
| DHFRL1   | ENSG00000178700 | dihydrofolate reductase like 1                             | -2.16 | 8.88E-12 |
| DUSP19   | ENSG00000162999 | dual specificity phosphatase 19                            | -2.20 | 9.15E-12 |
| SLC23A3  | ENSG00000213901 | solute carrier family 23 member 3                          | 3.77  | 9.74E-12 |
| ACER2    | ENSG00000177076 | alkaline ceramidase 2                                      | 2.33  | 9.98E-12 |
| EPHB1    | ENSG00000154928 | EPH receptor B1                                            | 2.94  | 1.01E-11 |
| JUND     | ENSG00000130522 | JunD proto-oncogene, AP-1 transcription factor<br>subunit  | 3.01  | 1.06E-11 |
| ANO7     | ENSG00000146205 | anoctamin 7                                                | 2.93  | 1.27E-11 |
| TFR2     | ENSG00000106327 | transferrin receptor 2                                     | 3.15  | 1.35E-11 |
| DOK7     | ENSG00000175920 | docking protein 7                                          | -2.97 | 1.37E-11 |
| FAM86HP  | ENSG00000253540 | family with sequence similarity 86 member H,<br>pseudogene | 2.55  | 1.58E-11 |
| VWA5A    | ENSG00000110002 | von Willebrand factor A domain containing 5A               | -2.08 | 1.62E-11 |
| FER1L4   | ENSG00000088340 | fer-1 like family member 4, pseudogene                     | 2.01  | 1.97E-11 |

|            |                 |                                                        |       |          |
|------------|-----------------|--------------------------------------------------------|-------|----------|
| HSP90AA1   | ENSG00000080824 | heat shock protein 90kDa alpha family class A member 1 | 2.05  | 1.97E-11 |
| FAM13A-AS1 | ENSG00000248019 | FAM13A antisense RNA 1                                 | 3.37  | 2.22E-11 |
| FAM201A    | ENSG00000204860 | family with sequence similarity 201 member A           | -3.82 | 2.37E-11 |
| RGS17      | ENSG00000091844 | regulator of G-protein signaling 17                    | 3.30  | 2.41E-11 |
| CROT       | ENSG00000005469 | carnitine O-octanoyltransferase                        | -2.03 | 2.43E-11 |
| SLC22A1    | ENSG00000175003 | solute carrier family 22 member 1                      | 3.77  | 2.51E-11 |
| FHDC1      | ENSG00000137460 | FH2 domain containing 1                                | 4.00  | 2.59E-11 |
| KRT7       | ENSG00000135480 | keratin 7                                              | -2.03 | 2.61E-11 |
| RASSF2     | ENSG00000101265 | Ras association domain family member 2                 | 2.29  | 3.10E-11 |
| LRRK1      | ENSG00000154237 | leucine rich repeat kinase 1                           | -7.03 | 3.15E-11 |
| P2RY11     | ENSG00000244165 | purinergic receptor P2Y11                              | 3.77  | 3.49E-11 |
| GCH1       | ENSG00000131979 | GTP cyclohydrolase 1                                   | 2.41  | 3.55E-11 |
| TMEM117    | ENSG00000139173 | transmembrane protein 117                              | -2.13 | 3.62E-11 |
| PABPC4L    | ENSG00000254535 | poly(A) binding protein cytoplasmic 4 like             | -2.38 | 3.91E-11 |
| PRR7-AS1   | ENSG00000246334 | PRR7 antisense RNA 1                                   | 2.60  | 4.04E-11 |



|           |                 |                                                                          |       |          |
|-----------|-----------------|--------------------------------------------------------------------------|-------|----------|
| LUCAT1    | ENSG00000248323 | lung cancer associated transcript 1 (non-protein coding)                 | 3.55  | 4.05E-11 |
| USP2      | ENSG00000036672 | ubiquitin specific peptidase 2                                           | -2.40 | 4.14E-11 |
| CASP6     | ENSG00000138794 | caspase 6                                                                | -2.02 | 4.57E-11 |
| LINC00662 | ENSG00000261824 | long intergenic non-protein coding RNA 662                               | 2.18  | 4.59E-11 |
| GAS6-AS1  | ENSG00000233695 | GAS6 antisense RNA 1                                                     | -4.71 | 4.63E-11 |
| DDO       | ENSG00000203797 | D-aspartate oxidase                                                      | -2.04 | 5.38E-11 |
| SPOCK2    | ENSG00000107742 | sparc/osteonectin, cwcv and kazal-like domains proteoglycan (testican) 2 | 2.97  | 6.04E-11 |
| GPR146    | ENSG00000164849 | G protein-coupled receptor 146                                           | 2.41  | 6.38E-11 |
| GNRH1     | ENSG00000147437 | gonadotropin releasing hormone 1                                         | 2.25  | 6.68E-11 |
| ARL6      | ENSG00000113966 | ADP ribosylation factor like GTPase 6                                    | 2.07  | 6.75E-11 |
| FAM86EP   | ENSG00000251669 | family with sequence similarity 86 member E, pseudogene                  | 2.29  | 7.27E-11 |
| DNAH11    | ENSG00000105877 | dynein axonemal heavy chain 11                                           | 2.28  | 7.37E-11 |
| COL13A1   | ENSG00000197467 | collagen type XIII alpha 1 chain                                         | 2.92  | 7.77E-11 |

|            |                 |                                                                |       |          |
|------------|-----------------|----------------------------------------------------------------|-------|----------|
| TM4SF1-AS1 | ENSG00000240541 | TM4SF1 antisense RNA 1                                         | -4.15 | 8.46E-11 |
| FAM86C1    | ENSG00000158483 | family with sequence similarity 86 member C1                   | 2.14  | 9.14E-11 |
| PDZRN3     | ENSG00000121440 | PDZ domain containing ring finger 3                            | -2.36 | 9.93E-11 |
| FAM86FP    | ENSG00000164845 | family with sequence similarity 86 member F,<br>pseudogene     | 2.32  | 9.98E-11 |
| LINC01089  | ENSG00000212694 | long intergenic non-protein coding RNA 1089                    | -2.14 | 1.09E-10 |
| ABAT       | ENSG00000183044 | 4-aminobutyrate aminotransferase                               | -2.01 | 1.25E-10 |
| SCX        | ENSG00000260428 | scleraxis bHLH transcription factor                            | -4.29 | 1.25E-10 |
| NPR3       | ENSG00000113389 | natriuretic peptide receptor 3                                 | -2.08 | 1.31E-10 |
| GPR39      | ENSG00000183840 | G protein-coupled receptor 39                                  | -3.20 | 1.35E-10 |
| LANCL3     | ENSG00000147036 | LanC like 3                                                    | 2.69  | 1.37E-10 |
| BBS12      | ENSG00000181004 | Bardet-Biedl syndrome 12                                       | -2.02 | 1.42E-10 |
| LRRK2      | ENSG00000188906 | leucine rich repeat kinase 2                                   | -2.03 | 1.43E-10 |
| CCDC88C    | ENSG00000015133 | coiled-coil domain containing 88C                              | 2.02  | 1.45E-10 |
| MDGA1      | ENSG00000112139 | MAM domain containing<br>glycosylphosphatidylinositol anchor 1 | -2.16 | 1.76E-10 |

|            |                 |                                                                   |       |          |
|------------|-----------------|-------------------------------------------------------------------|-------|----------|
| MAPK13     | ENSG00000156711 | mitogen-activated protein kinase 13                               | 2.52  | 1.78E-10 |
| PC         | ENSG00000173599 | pyruvate carboxylase                                              | 2.02  | 1.78E-10 |
| ID3        | ENSG00000117318 | inhibitor of DNA binding 3, HLH protein                           | -2.21 | 1.83E-10 |
| SULT1A1    | ENSG00000196502 | sulfotransferase family 1A member 1                               | -2.05 | 1.85E-10 |
| RGS9       | ENSG00000108370 | regulator of G-protein signaling 9                                | -2.07 | 2.27E-10 |
| FAM26E     | ENSG00000178033 | family with sequence similarity 26 member E                       | -3.48 | 2.28E-10 |
| FAM174B    | ENSG00000185442 | family with sequence similarity 174 member B                      | 2.00  | 2.38E-10 |
| RHEBL1     | ENSG00000167550 | Ras homolog enriched in brain like 1                              | 7.63  | 2.44E-10 |
| ZNF214     | ENSG00000149050 | zinc finger protein 214                                           | -2.60 | 2.61E-10 |
| CFI        | ENSG00000205403 | complement factor I                                               | -2.09 | 2.97E-10 |
| STX11      | ENSG00000135604 | syntaxin 11                                                       | 2.59  | 3.38E-10 |
| HEY1       | ENSG00000164683 | hes related family bHLH transcription factor with<br>YRPW motif 1 | 3.45  | 3.50E-10 |
| HLF        | ENSG00000108924 | HLF, PAR bZIP transcription factor                                | -2.26 | 3.72E-10 |
| HNRNPA1P33 | ENSG00000213412 | heterogeneous nuclear ribonucleoprotein A1<br>pseudogene 33       | -3.11 | 3.83E-10 |

|           |                 |                                                          |       |          |
|-----------|-----------------|----------------------------------------------------------|-------|----------|
| MSX1      | ENSG00000163132 | msh homeobox 1                                           | 2.30  | 3.89E-10 |
| CRABP2    | ENSG00000143320 | cellular retinoic acid binding protein 2                 | -2.01 | 5.46E-10 |
| TSPAN15   | ENSG00000099282 | tetraspanin 15                                           | -2.38 | 5.90E-10 |
| PCDH9     | ENSG00000184226 | protocadherin 9                                          | -2.24 | 6.11E-10 |
| BACH1-IT2 | ENSG00000228817 | BACH1 intronic transcript 2                              | 4.73  | 6.36E-10 |
| MIR27B    | ENSG00000207864 | microRNA 27b                                             | -2.81 | 6.75E-10 |
| MICALCL   | ENSG00000133808 | MICAL C-terminal like                                    | 4.38  | 6.83E-10 |
| SAMD11    | ENSG00000187634 | sterile alpha motif domain containing 11                 | -2.23 | 7.02E-10 |
| UPK3B     | ENSG00000276184 | uroplakin 3B                                             | -2.03 | 7.44E-10 |
| SLITRK5   | ENSG00000165300 | SLIT and NTRK like family member 5                       | -2.89 | 7.52E-10 |
| RAB6B     | ENSG00000154917 | RAB6B, member RAS oncogene family                        | 2.73  | 7.59E-10 |
| MAP1LC3B2 | ENSG00000258102 | microtubule associated protein 1 light chain 3<br>beta 2 | 2.73  | 7.61E-10 |
| MXRA8     | ENSG00000162576 | matrix remodeling associated 8                           | -2.15 | 7.73E-10 |
| SFMBT2    | ENSG00000198879 | Scm-like with four mbt domains 2                         | 2.04  | 8.29E-10 |
| POT1-AS1  | ENSG00000224897 | POT1 antisense RNA 1                                     | -3.49 | 8.47E-10 |

|              |                 |                                                                              |       |          |
|--------------|-----------------|------------------------------------------------------------------------------|-------|----------|
| KCNMB4       | ENSG00000135643 | potassium calcium-activated channel subfamily M<br>regulatory beta subunit 4 | -2.52 | 8.48E-10 |
| RAPSN        | ENSG00000165917 | receptor associated protein of the synapse                                   | 3.28  | 8.60E-10 |
| VSIG1        | ENSG00000101842 | V-set and immunoglobulin domain containing 1                                 | 2.17  | 9.97E-10 |
| RDH13        | ENSG00000276684 | retinol dehydrogenase 13 (all-trans/9-cis)                                   | 2.09  | 1.01E-09 |
| MFSD2A       | ENSG00000168389 | major facilitator superfamily domain containing 2A                           | 5.54  | 1.02E-09 |
| SLC22A23     | ENSG00000137266 | solute carrier family 22 member 23                                           | -2.02 | 1.05E-09 |
| IQUB         | ENSG00000164675 | IQ motif and ubiquitin domain containing                                     | -3.40 | 1.15E-09 |
| ZNF618       | ENSG00000157657 | zinc finger protein 618                                                      | -2.11 | 1.18E-09 |
| MT1X         | ENSG00000187193 | metallothionein 1X                                                           | 2.03  | 1.24E-09 |
| C4orf32      | ENSG00000174749 | chromosome 4 open reading frame 32                                           | 2.39  | 1.37E-09 |
| STX1A        | ENSG00000106089 | syntaxin 1A                                                                  | 2.83  | 1.38E-09 |
| LOC100507002 |                 |                                                                              | -3.48 | 1.43E-09 |
| MYBPHL       | ENSG00000221986 | myosin binding protein H-like                                                | -4.85 | 1.52E-09 |
| CEMIP        | ENSG00000103888 | cell migration inducing hyaluronan binding protein                           | -2.95 | 1.65E-09 |
| ARL4D        | ENSG00000175906 | ADP ribosylation factor like GTPase 4D                                       | -2.38 | 1.77E-09 |

|           |                 |                                                           |       |          |
|-----------|-----------------|-----------------------------------------------------------|-------|----------|
| RAPGEF4   | ENSG00000091428 | Rap guanine nucleotide exchange factor 4                  | 2.60  | 1.81E-09 |
| CSPG4     | ENSG00000173546 | chondroitin sulfate proteoglycan 4                        | -2.48 | 2.19E-09 |
| SFRP4     | ENSG00000106483 | secreted frizzled related protein 4                       | -2.38 | 2.42E-09 |
| LOC399815 |                 |                                                           | 2.59  | 2.49E-09 |
| PRR26     | ENSG00000180525 | proline rich 26                                           | -2.17 | 2.66E-09 |
| KCTD15    | ENSG00000153885 | potassium channel tetramerization domain<br>containing 15 | 2.01  | 2.76E-09 |
| DOK5      | ENSG00000101134 | docking protein 5                                         | 3.20  | 3.15E-09 |
| LPP-AS2   | ENSG00000270959 | LPP antisense RNA 2                                       | -2.46 | 3.71E-09 |
| TOX2      | ENSG00000124191 | TOX high mobility group box family member 2               | 2.32  | 3.83E-09 |
| AQP11     | ENSG00000178301 | aquaporin 11                                              | -2.09 | 3.85E-09 |
| FRAT1     | ENSG00000165879 | frequently rearranged in advanced T-cell<br>lymphomas 1   | -3.08 | 4.16E-09 |
| MAOB      | ENSG00000069535 | monoamine oxidase B                                       | -2.75 | 4.70E-09 |
| DSC1      | ENSG00000134765 | desmocollin 1                                             | -2.91 | 5.05E-09 |

|           |                 |                                                                            |       |          |
|-----------|-----------------|----------------------------------------------------------------------------|-------|----------|
| HCN3      | ENSG00000143630 | hyperpolarization activated cyclic nucleotide<br>gated potassium channel 3 | 2.24  | 5.25E-09 |
| ADAM22    | ENSG00000008277 | ADAM metallopeptidase domain 22                                            | -2.39 | 5.26E-09 |
| MAMLD1    | ENSG00000013619 | mastermind like domain containing 1                                        | 3.65  | 5.91E-09 |
| MURC      | ENSG00000170681 | muscle related coiled-coil protein                                         | 2.72  | 6.38E-09 |
| GLRX      | ENSG00000173221 | glutaredoxin                                                               | -2.14 | 7.01E-09 |
| CHDH      | ENSG00000016391 | choline dehydrogenase                                                      | -2.17 | 7.61E-09 |
| C2orf61   | ENSG00000239605 | chromosome 2 open reading frame 61                                         | 3.51  | 7.69E-09 |
| LOC115110 |                 |                                                                            | 2.05  | 8.10E-09 |
| DACH1     | ENSG00000276644 | dachshund family transcription factor 1                                    | -2.41 | 8.29E-09 |
| APTR      | ENSG00000214293 | Alu-mediated CDKN1A/p21 transcriptional<br>regulator (non-protein coding)  | 2.21  | 8.63E-09 |
| BEND5     | ENSG00000162373 | BEN domain containing 5                                                    | 2.04  | 8.71E-09 |
| BAHCC1    | ENSG00000266074 | BAH domain and coiled-coil containing 1                                    | -2.38 | 9.38E-09 |
| EXOC3-AS1 | ENSG00000221990 | EXOC3 antisense RNA 1                                                      | -2.42 | 9.58E-09 |
| TMEM265   | ENSG00000281991 | transmembrane protein 265                                                  | 2.01  | 1.01E-08 |

|           |                 |                                                                        |       |          |
|-----------|-----------------|------------------------------------------------------------------------|-------|----------|
| HMCN1     | ENSG00000143341 | hemicentin 1                                                           | -2.02 | 1.02E-08 |
| PHEX      | ENSG00000102174 | phosphate regulating endopeptidase homolog, X-linked                   | 3.87  | 1.03E-08 |
| SAMD9     | ENSG00000205413 | sterile alpha motif domain containing 9                                | 2.46  | 1.10E-08 |
| CCDC28B   | ENSG00000160050 | coiled-coil domain containing 28B                                      | -2.45 | 1.11E-08 |
| FPGT      | ENSG00000254685 | fucose-1-phosphate guanylyltransferase                                 | -2.15 | 1.21E-08 |
| N4BP3     | ENSG00000145911 | NEDD4 binding protein 3                                                | 6.17  | 1.27E-08 |
| TMEFF2    | ENSG00000144339 | transmembrane protein with EGF like and two follistatin like domains 2 | -2.43 | 1.30E-08 |
| HIST3H2BB | ENSG00000196890 | histone cluster 3, H2bb                                                | -2.40 | 1.30E-08 |
| ZNF204P   | ENSG00000204789 | zinc finger protein 204, pseudogene                                    | -2.14 | 1.31E-08 |
| KIAA1549L | ENSG00000110427 | KIAA1549-like                                                          | 2.54  | 1.38E-08 |
| S1PR5     | ENSG00000180739 | sphingosine-1-phosphate receptor 5                                     | -2.16 | 1.47E-08 |
| SMIM6     | ENSG00000259120 | small integral membrane protein 6                                      | -2.94 | 1.87E-08 |
| RAB39B    | ENSG00000155961 | RAB39B, member RAS oncogene family                                     | 2.19  | 2.02E-08 |
| BCL11B    | ENSG00000127152 | B-cell CLL/lymphoma 11B                                                | 2.24  | 2.20E-08 |



|              |                 |                                            |       |          |
|--------------|-----------------|--------------------------------------------|-------|----------|
| LOC101929705 |                 |                                            | 2.78  | 2.29E-08 |
| OGDHL        | ENSG00000197444 | oxoglutarate dehydrogenase-like            | -2.18 | 2.48E-08 |
| CEP19        | ENSG00000174007 | centrosomal protein 19                     | -2.11 | 2.96E-08 |
| SLC16A6      | ENSG00000108932 | solute carrier family 16 member 6          | 2.60  | 2.99E-08 |
| LZTS3        | ENSG00000088899 | Leucine zipper putative tumor suppressor 3 | 2.00  | 3.27E-08 |
| EPHA1-AS1    | ENSG00000229153 | EPHA1 antisense RNA 1                      | 3.74  | 3.27E-08 |
| MLLT4-AS1    | ENSG00000198221 | MLLT4 antisense RNA 1 (head to head)       | -3.01 | 3.33E-08 |
| OPRK1        | ENSG00000082556 | opioid receptor kappa 1                    | 3.15  | 3.37E-08 |
| NEK3         | ENSG00000136098 | NIMA related kinase 3                      | 3.28  | 3.72E-08 |
| EGR1         | ENSG00000120738 | early growth response 1                    | 2.96  | 4.00E-08 |
| SLC4A5       | ENSG00000188687 | solute carrier family 4 member 5           | 2.96  | 4.07E-08 |
| BEND3        | ENSG00000178409 | BEN domain containing 3                    | 2.09  | 4.08E-08 |
| GUCY1B3      | ENSG00000061918 | guanylate cyclase 1, soluble, beta 3       | -2.22 | 4.12E-08 |
| SLC17A9      | ENSG00000101194 | solute carrier family 17 member 9          | 2.10  | 4.28E-08 |
| PLCL1        | ENSG00000115896 | phospholipase C like 1                     | -3.61 | 4.36E-08 |
| LAMB2P1      | ENSG00000270441 | laminin subunit beta 2 pseudogene 1        | 3.96  | 4.55E-08 |

|              |                 |                                               |       |          |
|--------------|-----------------|-----------------------------------------------|-------|----------|
| NMNAT3       | ENSG00000163864 | nicotinamide nucleotide adenylyltransferase 3 | -2.13 | 4.86E-08 |
| KRT86        | ENSG00000170442 | keratin 86                                    | -2.20 | 4.89E-08 |
| WDR66        | ENSG00000158023 | WD repeat domain 66                           | 2.26  | 4.89E-08 |
| FLJ20021     | ENSG00000254531 | uncharacterized LOC90024                      | -2.29 | 5.17E-08 |
| RNF122       | ENSG00000133874 | ring finger protein 122                       | 2.22  | 6.07E-08 |
| PAPPA2       | ENSG00000116183 | pappalysin 2                                  | 3.89  | 6.27E-08 |
| B3GALT4      | ENSG00000235155 | beta-1,3-galactosyltransferase 4              | -2.70 | 7.14E-08 |
| RAPGEF5      | ENSG00000136237 | Rap guanine nucleotide exchange factor 5      | -2.01 | 7.20E-08 |
| CASC1        | ENSG00000118307 | cancer susceptibility candidate 1             | -4.38 | 7.71E-08 |
| LUZP2        | ENSG00000187398 | leucine zipper protein 2                      | 2.23  | 8.28E-08 |
| LOC101927087 |                 |                                               | 2.88  | 8.51E-08 |
| STOX1        | ENSG00000165730 | storkhead box 1                               | -3.39 | 9.44E-08 |
| VASN         | ENSG00000274334 | vasorin                                       | -2.26 | 9.44E-08 |
| SLC35F3      | ENSG00000183780 | solute carrier family 35 member F3            | 2.57  | 9.90E-08 |
| HYAL3        | ENSG00000186792 | hyaluronoglucosaminidase 3                    | 2.03  | 1.03E-07 |
| ZMYND10      | ENSG00000004838 | zinc finger MYND-type containing 10           | -2.54 | 1.06E-07 |

|              |                 |                                                                                         |       |          |
|--------------|-----------------|-----------------------------------------------------------------------------------------|-------|----------|
| ARG2         | ENSG00000081181 | arginase 2                                                                              | 2.01  | 1.09E-07 |
| OLFML1       | ENSG00000183801 | olfactomedin like 1                                                                     | -3.77 | 1.13E-07 |
| LOC101927901 |                 |                                                                                         | -4.34 | 1.15E-07 |
| SLC45A2      | ENSG00000164175 | solute carrier family 45 member 2                                                       | -3.68 | 1.15E-07 |
| CBR3         | ENSG00000159231 | carbonyl reductase 3                                                                    | -2.04 | 1.24E-07 |
| BFSP1        | ENSG00000125864 | beaded filament structural protein 1                                                    | -2.03 | 1.33E-07 |
| CBLN2        | ENSG00000141668 | cerebellin 2 precursor                                                                  | -4.30 | 1.47E-07 |
| DMGDH        | ENSG00000132837 | dimethylglycine dehydrogenase                                                           | -2.11 | 1.51E-07 |
| CMYA5        | ENSG00000164309 | cardiomyopathy associated 5                                                             | -2.30 | 1.64E-07 |
| FSCN1        | ENSG00000075618 | fascin actin-bundling protein 1                                                         | -2.06 | 1.80E-07 |
| ZNF491       | ENSG00000177599 | zinc finger protein 491                                                                 | -2.14 | 1.93E-07 |
| PTPRZ1       | ENSG00000106278 | protein tyrosine phosphatase, receptor type Z1                                          | -3.64 | 2.03E-07 |
| ARHGAP5-AS1  | ENSG00000258655 | ARHGAP5 antisense RNA 1 (head to head)                                                  | -2.16 | 2.19E-07 |
| SPAG8        | ENSG00000137098 | sperm associated antigen 8                                                              | -3.44 | 2.37E-07 |
| MGAT5B       | ENSG00000167889 | mannosyl (alpha-1,6-)-glycoprotein beta-1,6-N-acetyl-glucosaminyltransferase, isozyme B | 2.02  | 2.41E-07 |

|              |                 |                                                         |       |          |
|--------------|-----------------|---------------------------------------------------------|-------|----------|
| PTGDS        | ENSG00000107317 | prostaglandin D2 synthase                               | -2.22 | 2.87E-07 |
| LIPE         | ENSG00000079435 | lipase E, hormone sensitive type                        | -2.23 | 2.94E-07 |
| BTBD8        | ENSG00000189195 | BTB domain containing 8                                 | -2.23 | 3.01E-07 |
| PTX3         | ENSG00000163661 | pentraxin 3                                             | 2.39  | 3.21E-07 |
| KCNB1        | ENSG00000158445 | potassium voltage-gated channel subfamily B<br>member 1 | -2.30 | 3.29E-07 |
| OTX2-AS1     | ENSG00000248550 | OTX2 antisense RNA 1 (head to head)                     | -2.57 | 3.39E-07 |
| LOC100128076 |                 |                                                         | -2.31 | 3.41E-07 |
| RNVU1-6      | ENSG00000201558 | RNA, variant U1 small nuclear 6                         | -3.12 | 3.50E-07 |
| TBX3         | ENSG00000135111 | T-box 3                                                 | 2.03  | 3.64E-07 |
| TMEM79       | ENSG00000163472 | transmembrane protein 79                                | 2.01  | 3.70E-07 |
| PGM5-AS1     | ENSG00000224958 | PGM5 antisense RNA 1                                    | -2.62 | 4.00E-07 |
| RDH5         | ENSG00000135437 | retinol dehydrogenase 5                                 | -2.12 | 4.06E-07 |
| PCDHB2       | ENSG00000112852 | protocadherin beta 2                                    | -2.43 | 4.45E-07 |
| CAPS         | ENSG00000105519 | calcyphosine                                            | -2.11 | 4.57E-07 |
| PRR29        | ENSG00000224383 | proline rich 29                                         | -3.19 | 4.70E-07 |

|            |                 |                                                            |       |          |
|------------|-----------------|------------------------------------------------------------|-------|----------|
| SNAPC5     | ENSG00000174446 | small nuclear RNA activating complex<br>polypeptide 5      | -2.19 | 5.21E-07 |
| CBARP      | ENSG00000099625 | CACN beta subunit associated regulatory protein            | 2.67  | 5.54E-07 |
| SERPINE3   | ENSG00000253309 | serpin family E member 3                                   | -2.60 | 5.65E-07 |
| ZNF233     | ENSG00000159915 | zinc finger protein 233                                    | -2.24 | 6.00E-07 |
| SLC29A3    | ENSG00000198246 | solute carrier family 29 member 3                          | -2.36 | 6.10E-07 |
| MMAA       | ENSG00000151611 | methylmalonic aciduria (cobalamin deficiency)<br>cblA type | -2.06 | 6.22E-07 |
| MAGEE1     | ENSG00000198934 | MAGE family member E1                                      | -2.48 | 6.34E-07 |
| MGC12916   | ENSG00000266709 | uncharacterized protein MGC12916                           | 2.19  | 6.70E-07 |
| PITRM1-AS1 | ENSG00000237399 | PITRM1 antisense RNA 1                                     | 2.54  | 7.45E-07 |
| DERL3      | ENSG00000274437 | derlin 3                                                   | 2.19  | 7.46E-07 |
| SLC2A14    | ENSG00000173262 | solute carrier family 2 member 14                          | 2.56  | 7.69E-07 |
| LSMEM1     | ENSG00000181016 | leucine rich single-pass membrane protein 1                | 3.36  | 7.72E-07 |
| MYO15B     | ENSG00000266714 | myosin XVB                                                 | -2.33 | 7.81E-07 |
| VTRNA1-3   | ENSG00000202515 | vault RNA 1-3                                              | 2.41  | 7.85E-07 |

|              |                 |                                                          |       |          |
|--------------|-----------------|----------------------------------------------------------|-------|----------|
| LCTL         | ENSG00000188501 | lactase like                                             | -2.06 | 8.88E-07 |
| PRRT3        | ENSG00000163704 | proline rich transmembrane protein 3                     | -2.12 | 8.88E-07 |
| SPNS3        | ENSG00000182557 | sphingolipid transporter 3 (putative)                    | -2.73 | 9.43E-07 |
| RELL2        | ENSG00000164620 | RELT like 2                                              | 2.02  | 9.47E-07 |
| KRTAP5-AS1   | ENSG00000281176 | KRTAP5-1/KRTAP5-2 antisense RNA 1                        | 3.53  | 9.72E-07 |
| LOC100506258 |                 |                                                          | -2.64 | 9.80E-07 |
| CXCL3        | ENSG00000163734 | C-X-C motif chemokine ligand 3                           | 3.77  | 1.01E-06 |
| RPS6KL1      | ENSG00000198208 | ribosomal protein S6 kinase like 1                       | 2.18  | 1.01E-06 |
| HIST3H2A     | ENSG00000181218 | histone cluster 3, H2a                                   | -2.35 | 1.04E-06 |
| RAB26        | ENSG00000167964 | RAB26, member RAS oncogene family                        | -2.03 | 1.10E-06 |
| LIPH         | ENSG00000163898 | lipase H                                                 | -2.37 | 1.14E-06 |
| TP63         | ENSG00000073282 | tumor protein p63                                        | -2.59 | 1.18E-06 |
| C6orf226     | ENSG00000221821 | chromosome 6 open reading frame 226                      | -2.90 | 1.38E-06 |
| KCNJ14       | ENSG00000182324 | potassium voltage-gated channel subfamily J<br>member 14 | 2.63  | 1.50E-06 |

|              |                 |                                                                       |       |          |
|--------------|-----------------|-----------------------------------------------------------------------|-------|----------|
| FAM86B3P     | ENSG00000173295 | family with sequence similarity 86 member B3,<br>pseudogene           | 2.38  | 1.55E-06 |
| MDGA2        | ENSG00000139915 | MAM domain containing<br>glycosylphosphatidylinositol anchor 2        | 2.21  | 1.57E-06 |
| AIM1L        | ENSG00000176092 | absent in melanoma 1-like                                             | 3.07  | 1.66E-06 |
| KLHDC9       | ENSG00000162755 | kelch domain containing 9                                             | -2.17 | 1.66E-06 |
| EVA1B        | ENSG00000142694 | eva-1 homolog B (C. elegans)                                          | -2.31 | 1.74E-06 |
| LOC100049716 |                 |                                                                       | -2.61 | 1.75E-06 |
| IFITM1       | ENSG00000185885 | interferon induced transmembrane protein 1                            | 2.65  | 2.20E-06 |
| LURAP1L-AS1  | ENSG00000235448 | LURAP1L antisense RNA 1                                               | 2.37  | 2.35E-06 |
| ARID3A       | ENSG00000116017 | AT-rich interaction domain 3A                                         | 2.27  | 2.40E-06 |
| TTLL11       | ENSG00000175764 | tubulin tyrosine ligase like 11                                       | 2.09  | 2.46E-06 |
| SULT4A1      | ENSG00000130540 | sulfotransferase family 4A member 1                                   | 2.09  | 2.48E-06 |
| SNORA33      | ENSG00000202283 | Small nucleolar RNA SNORA33                                           | -2.70 | 2.71E-06 |
| VMAC         | ENSG00000187650 | vimentin-type intermediate filament associated<br>coiled-coil protein | -2.20 | 2.81E-06 |

|           |                 |                                                               |       |          |
|-----------|-----------------|---------------------------------------------------------------|-------|----------|
| LINC01003 | ENSG00000261455 | long intergenic non-protein coding RNA 1003                   | -2.34 | 2.84E-06 |
| FAM86B2   | ENSG00000145002 | family with sequence similarity 86 member B2                  | 2.69  | 2.90E-06 |
| FRMD3     | ENSG00000172159 | FERM domain containing 3                                      | 2.47  | 3.21E-06 |
| NUDT7     | ENSG00000140876 | nudix hydrolase 7                                             | -2.15 | 3.22E-06 |
| SMOX      | ENSG00000088826 | spermine oxidase                                              | 2.24  | 3.29E-06 |
| PINLYP    | ENSG00000234465 | phospholipase A2 inhibitor and LY6/PLAUR<br>domain containing | 2.53  | 3.34E-06 |
| LRRC66    | ENSG00000188993 | leucine rich repeat containing 66                             | 2.40  | 3.36E-06 |
| C3orf35   | ENSG00000198590 | chromosome 3 open reading frame 35                            | 2.68  | 3.62E-06 |
| LOC728323 |                 |                                                               | 2.04  | 3.65E-06 |
| TESK2     | ENSG00000070759 | testis-specific kinase 2                                      | -2.12 | 3.67E-06 |
| FGF14-AS2 | ENSG00000272143 | FGF14 antisense RNA 2                                         | -3.66 | 3.77E-06 |
| AR        | ENSG00000169083 | androgen receptor                                             | -2.26 | 3.96E-06 |
| MFI2-AS1  | ENSG00000228109 | MFI2 antisense RNA 1                                          | -2.02 | 4.40E-06 |
| DCDC5     | ENSG00000170959 | doublecortin domain containing 5                              | -2.64 | 4.72E-06 |
| C1orf110  | ENSG00000185860 | coiled-coil domain containing 190                             | -2.73 | 4.78E-06 |



|              |                 |                                               |       |          |
|--------------|-----------------|-----------------------------------------------|-------|----------|
| IL32         | ENSG00000008517 | interleukin 32                                | 2.39  | 4.81E-06 |
| ANXA9        | ENSG00000143412 | annexin A9                                    | -2.90 | 5.10E-06 |
| ASB9         | ENSG00000102048 | ankyrin repeat and SOCS box containing 9      | -2.14 | 5.15E-06 |
| RAP1GAP      | ENSG00000076864 | RAP1 GTPase activating protein                | -2.75 | 5.44E-06 |
| CALHM2       | ENSG00000138172 | calcium homeostasis modulator 2               | -2.09 | 6.00E-06 |
| MICB         | ENSG00000227772 | MHC class I polypeptide-related sequence B    | 3.04  | 6.31E-06 |
| MGC2889      |                 |                                               | 3.26  | 6.36E-06 |
| CXCL14       | ENSG00000145824 | C-X-C motif chemokine ligand 14               | -2.36 | 6.98E-06 |
| NR6A1        | ENSG00000148200 | nuclear receptor subfamily 6 group A member 1 | 2.01  | 7.04E-06 |
| SHF          | ENSG00000138606 | Src homology 2 domain containing F            | -2.71 | 7.13E-06 |
| LOC101928509 |                 |                                               | -2.68 | 7.49E-06 |
| MIR125B1     | ENSG00000207971 | microRNA 125b-1                               | -2.44 | 7.70E-06 |
| ONECUT2      | ENSG00000119547 | one cut homeobox 2                            | 2.27  | 9.03E-06 |
| UPB1         | ENSG00000100024 | beta-ureidopropionase 1                       | -3.01 | 9.08E-06 |
| C7orf69      | ENSG00000136275 | chromosome 7 open reading frame 69            | -2.68 | 9.28E-06 |
| CD200        | ENSG00000091972 | CD200 molecule                                | -2.03 | 9.54E-06 |

|            |                 |                                                    |       |          |
|------------|-----------------|----------------------------------------------------|-------|----------|
| EID2B      | ENSG00000176401 | EP300 interacting inhibitor of differentiation 2B  | -2.33 | 1.07E-05 |
| NDUFA6-AS1 | ENSG00000273616 | NDUFA6 antisense RNA 1 (head to head)              | -2.05 | 1.11E-05 |
| ABCC6      | ENSG00000091262 | ATP binding cassette subfamily C member 6          | -3.23 | 1.17E-05 |
| CCDC17     | ENSG00000159588 | coiled-coil domain containing 17                   | 2.11  | 1.23E-05 |
| CTAGE15    | ENSG00000271079 | CTAGE family member 15                             | 2.86  | 1.25E-05 |
| LRRC48     | ENSG00000171962 | dynein regulatory complex subunit 3                | -2.90 | 1.31E-05 |
| NDRG2      | ENSG00000165795 | NDRG family member 2                               | -2.32 | 1.34E-05 |
| MFSD4      | ENSG00000174514 | major facilitator superfamily domain containing 4A | -2.15 | 1.38E-05 |
| SHANK3     | ENSG00000251322 | SH3 and multiple ankyrin repeat domains 3          | 2.52  | 1.46E-05 |
| FMO5       | ENSG00000131781 | flavin containing monooxygenase 5                  | -2.48 | 1.49E-05 |
| CRB3       | ENSG00000130545 | crumbs 3, cell polarity complex component          | -2.39 | 1.60E-05 |
| MAP1A      | ENSG00000166963 | microtubule associated protein 1A                  | -2.08 | 1.64E-05 |
| COL8A2     | ENSG00000171812 | collagen type VIII alpha 2                         | -2.21 | 1.70E-05 |
| RNF224     | ENSG00000233198 | ring finger protein 224                            | -3.01 | 1.70E-05 |
| OSBPL6     | ENSG00000079156 | oxysterol binding protein like 6                   | 2.10  | 1.72E-05 |
| SLC43A2    | ENSG00000167703 | solute carrier family 43 member 2                  | -2.01 | 1.88E-05 |

|            |                 |                                                                |       |          |
|------------|-----------------|----------------------------------------------------------------|-------|----------|
| NRCAM      | ENSG00000091129 | neuronal cell adhesion molecule                                | 2.90  | 1.94E-05 |
| SLC6A10P   | ENSG00000214617 | solute carrier family 6 member 10, pseudogene                  | 2.32  | 1.94E-05 |
| TRIM7      | ENSG00000146054 | tripartite motif containing 7                                  | 2.06  | 2.08E-05 |
| QPRT       | ENSG00000103485 | quinolinate phosphoribosyltransferase                          | -2.66 | 2.09E-05 |
| LENG9      | ENSG00000275183 | leukocyte receptor cluster member 9                            | -2.13 | 2.09E-05 |
| RAET1K     | ENSG00000218358 | retinoic acid early transcript 1K pseudogene                   | 2.09  | 2.18E-05 |
| NEAT1      | ENSG00000245532 | nuclear paraspeckle assembly transcript 1 (non-protein coding) | 2.32  | 2.19E-05 |
| SPSB2      | ENSG00000111671 | splA/ryanodine receptor domain and SOCS box containing 2       | -2.34 | 2.23E-05 |
| ST6GALNAC5 | ENSG00000117069 | ST6 N-acetylgalactosaminide alpha-2,6-sialyltransferase 5      | -2.17 | 2.36E-05 |
| ENTPD3     | ENSG00000168032 | ectonucleoside triphosphate diphosphohydrolase 3               | -2.79 | 2.61E-05 |
| NPPA-AS1   | ENSG00000242349 | NPPA antisense RNA 1                                           | 2.61  | 2.71E-05 |
| MOCOS      | ENSG00000075643 | molybdenum cofactor sulfurase                                  | 2.67  | 2.73E-05 |

|                  |                 |                                                    |       |          |
|------------------|-----------------|----------------------------------------------------|-------|----------|
| KCNIP4-IT1       | ENSG00000280650 | KCNIP4 intronic transcript 1                       | -2.62 | 2.94E-05 |
| DSCC1            | ENSG00000136982 | DNA replication and sister chromatid cohesion 1    | -2.14 | 2.97E-05 |
| ADAM20           | ENSG00000134007 | ADAM metallopeptidase domain 20                    | 2.13  | 3.03E-05 |
| ALOX5AP          | ENSG00000132965 | arachidonate 5-lipoxygenase activating protein     | -2.59 | 3.18E-05 |
| NPHP3-<br>ACAD11 | ENSG00000274810 | NPHP3-ACAD11 readthrough (NMD candidate)           | 2.12  | 3.53E-05 |
| MIR181A1HG       | ENSG00000229989 | MIR181A1 host gene                                 | -2.27 | 3.62E-05 |
| RARA-AS1         | ENSG00000265666 | RARA antisense RNA 1                               | -2.37 | 3.73E-05 |
| UBAP1L           | ENSG00000246922 | ubiquitin associated protein 1 like                | 2.36  | 3.83E-05 |
| ZNF467           | ENSG00000181444 | zinc finger protein 467                            | -2.37 | 3.86E-05 |
| RIBC1            | ENSG00000158423 | RIB43A domain with coiled-coils 1                  | -2.70 | 3.97E-05 |
| TSNAXIP1         | ENSG00000102904 | translin associated factor X interacting protein 1 | -2.14 | 4.52E-05 |
| NXNL2            | ENSG00000130045 | nucleoredoxin-like 2                               | -2.21 | 4.81E-05 |
| SIM2             | ENSG00000159263 | single-minded family bHLH transcription factor 2   | 2.07  | 4.82E-05 |
| TFAP2A-AS1       | ENSG00000229950 | TFAP2A antisense RNA 1                             | -2.05 | 6.04E-05 |
| ZNF732           | ENSG00000186777 | zinc finger protein 732                            | 2.27  | 6.09E-05 |

|              |                 |                                                      |       |          |
|--------------|-----------------|------------------------------------------------------|-------|----------|
| KCNQ4        | ENSG00000117013 | potassium voltage-gated channel subfamily Q member 4 | 2.37  | 6.23E-05 |
| TNXB         | ENSG00000231608 | tenascin XB                                          | 2.16  | 6.51E-05 |
| PROCA1       | ENSG00000167525 | protein interacting with cyclin A1                   | -2.21 | 6.78E-05 |
| LOC100506368 |                 |                                                      | -2.34 | 6.97E-05 |
| PRRT2        | ENSG00000167371 | proline rich transmembrane protein 2                 | -2.33 | 7.03E-05 |
| DICER1-AS1   | ENSG00000235706 | DICER1 antisense RNA 1                               | -2.50 | 7.16E-05 |
| TPI1P2       | ENSG00000230359 | triosephosphate isomerase 1 pseudogene 2             | -2.64 | 8.25E-05 |
| URB1-AS1     | ENSG00000256073 | URB1 antisense RNA 1 (head to head)                  | -2.84 | 8.61E-05 |
| SERHL2       | ENSG00000183569 | serine hydrolase-like 2                              | -2.18 | 8.67E-05 |
| HRH1         | ENSG00000196639 | histamine receptor H1                                | 2.06  | 8.88E-05 |
| FAM227B      | ENSG00000166262 | family with sequence similarity 227 member B         | -2.01 | 9.36E-05 |
| TMEM81       | ENSG00000174529 | transmembrane protein 81                             | 2.11  | 9.44E-05 |
| KRTAP2-3     | ENSG00000262862 | keratin associated protein 2-3                       | 2.04  | 0.000100 |
| LCP1         | ENSG00000136167 | lymphocyte cytosolic protein 1                       | 2.04  | 0.000104 |
| TMEM232      | ENSG00000186952 | transmembrane protein 232                            | -2.09 | 0.000104 |

|              |                 |                                                                                                |       |          |
|--------------|-----------------|------------------------------------------------------------------------------------------------|-------|----------|
| LDLRAD4      | ENSG00000168675 | low density lipoprotein receptor class A domain<br>containing 4                                | -2.29 | 0.000115 |
| LOC100507557 |                 |                                                                                                | -2.32 | 0.000115 |
| IL20RB       | ENSG00000174564 | interleukin 20 receptor subunit beta                                                           | 2.44  | 0.000116 |
| PWWP2B       | ENSG00000171813 | PWWP domain containing 2B                                                                      | 2.40  | 0.000116 |
| LINC01573    | ENSG00000237886 | NOTCH1 associated lncRNA in T-cell acute<br>lymphoblastic leukemia 1                           | -2.12 | 0.000118 |
| LOC101930010 |                 |                                                                                                | 2.23  | 0.000122 |
| LOC101927481 |                 |                                                                                                | 2.38  | 0.000122 |
| NRG2         | ENSG00000158458 | neuregulin 2                                                                                   | -2.20 | 0.000126 |
| COLQ         | ENSG00000206561 | collagen-like tail subunit (single strand of<br>homotrimer) of asymmetric acetylcholinesterase | -2.16 | 0.000134 |
| RPL21P44     | ENSG00000229585 | ribosomal protein L21 pseudogene 44                                                            | 2.03  | 0.000134 |
| GRIN2C       | ENSG00000161509 | glutamate ionotropic receptor NMDA type subunit<br>2C                                          | 2.51  | 0.000161 |
| LINC00324    | ENSG00000178977 | long intergenic non-protein coding RNA 324                                                     | -2.02 | 0.000163 |

|           |                 |                                                              |       |          |
|-----------|-----------------|--------------------------------------------------------------|-------|----------|
| PPAN      | ENSG00000130810 | peter pan homolog (Drosophila)                               | 2.14  | 0.000179 |
| CEBPB-AS1 | ENSG00000277449 | CEBPB antisense RNA 1                                        | 2.11  | 0.000186 |
| CTAGE9    | ENSG00000236761 | CTAGE family member 9                                        | 2.45  | 0.000207 |
| TMEM71    | ENSG00000165071 | transmembrane protein 71                                     | 2.06  | 0.000225 |
| TMSB4Y    | ENSG00000154620 | thymosin beta 4, Y-linked                                    | -2.40 | 0.000249 |
| THEMIS2   | ENSG00000130775 | thymocyte selection associated family member 2               | 2.52  | 0.000259 |
| PCAT6     | ENSG00000228288 | prostate cancer associated transcript 6 (non-protein coding) | 2.18  | 0.000270 |
| AIM1      | ENSG00000112297 | absent in melanoma 1                                         | 3.42  | 0.000280 |
| PLEKHA4   | ENSG00000105559 | pleckstrin homology domain containing A4                     | 2.11  | 0.000312 |
| CCDC3     | ENSG00000151468 | coiled-coil domain containing 3                              | -2.00 | 0.000313 |
| LINC01465 | ENSG00000221949 | long intergenic non-protein coding RNA 1465                  | -2.63 | 0.000323 |
| NCKAP5    | ENSG00000176771 | NCK associated protein 5                                     | -2.07 | 0.000346 |
| TNFAIP2   | ENSG00000185215 | TNF alpha induced protein 2                                  | -2.56 | 0.000421 |
| METRN     | ENSG00000103260 | meteorin, glial cell differentiation regulator               | -2.25 | 0.000444 |
| ADAM28    | ENSG00000042980 | ADAM metallopeptidase domain 28                              | -3.23 | 0.000451 |

|              |                 |                                                                   |       |          |
|--------------|-----------------|-------------------------------------------------------------------|-------|----------|
| S100A4       | ENSG00000196154 | S100 calcium binding protein A4                                   | -2.09 | 0.000452 |
| FAM78A       | ENSG00000126882 | family with sequence similarity 78 member A                       | -2.19 | 0.000462 |
| LINC01271    | ENSG00000233077 | long intergenic non-protein coding RNA 1271                       | -2.12 | 0.000476 |
| SNORD14C     | ENSG00000202252 | small nucleolar RNA, C/D box 14C                                  | 2.83  | 0.000537 |
| RHPN1-AS1    | ENSG00000254389 | RHPN1 antisense RNA 1 (head to head)                              | -2.21 | 0.000578 |
| PEX11G       | ENSG00000104883 | peroxisomal biogenesis factor 11 gamma                            | -2.11 | 0.000590 |
| ADPRHL1      | ENSG00000153531 | ADP-ribosylhydrolase like 1                                       | 2.34  | 0.000603 |
| PLCD4        | ENSG00000115556 | phospholipase C delta 4                                           | -2.04 | 0.000609 |
| RNVU1-8      | ENSG00000201142 | RNA, variant U1 small nuclear 8                                   | -3.18 | 0.000715 |
| GPRIN2       | ENSG00000204175 | G protein regulated inducer of neurite outgrowth 2                | -2.08 | 0.000745 |
| NPIPA5       | ENSG00000282705 | nuclear pore complex interacting protein family<br>member A5      | 2.07  | 0.000772 |
| TMC3         | ENSG00000188869 | transmembrane channel like 3                                      | -3.24 | 0.000782 |
| B3GNT3       | ENSG00000179913 | UDP-GlcNAc:betaGal beta-1,3-N-<br>acetylglucosaminyltransferase 3 | -2.13 | 0.000801 |
| SLC25A21-AS1 | ENSG00000258708 | SLC25A21 antisense RNA 1                                          | -2.06 | 0.000836 |



|              |                 |                                                                         |       |         |
|--------------|-----------------|-------------------------------------------------------------------------|-------|---------|
| SMIM10L2B    | ENSG00000196972 | small integral membrane protein 10 like 2B                              | -2.14 | 0.00100 |
| OLMALINC     | ENSG00000235823 | oligodendrocyte maturation-associated long<br>intergenic non-coding RNA | 2.04  | 0.00102 |
| METTL7B      | ENSG00000170439 | methyltransferase like 7B                                               | -2.30 | 0.00120 |
| LINC01152    | ENSG00000256124 | long intergenic non-protein coding RNA 1152                             | -2.03 | 0.00123 |
| ZCCHC18      | ENSG00000166707 | zinc finger CCHC-type containing 18                                     | -2.17 | 0.00124 |
| XDH          | ENSG00000158125 | xanthine dehydrogenase                                                  | 2.22  | 0.00126 |
| MAP3K15      | ENSG00000180815 | mitogen-activated protein kinase kinase kinase 15                       | 2.03  | 0.00130 |
| MIR1204      | ENSG00000275264 | microRNA 1204                                                           | 2.27  | 0.00135 |
| LOC100130460 |                 |                                                                         | 2.02  | 0.00137 |
| COPG2IT1     |                 |                                                                         | 2.02  | 0.00141 |
| PPFIA3       | ENSG00000177380 | PTPRF interacting protein alpha 3                                       | 2.04  | 0.00158 |
| FUT8-AS1     | ENSG00000276116 | FUT8 antisense RNA 1                                                    | -2.23 | 0.00161 |
| GNB3         | ENSG00000111664 | G protein subunit beta 3                                                | 2.16  | 0.00188 |
| SEC24B-AS1   | ENSG00000247950 | SEC24B antisense RNA 1                                                  | -2.01 | 0.00199 |
| F12          | ENSG00000131187 | coagulation factor XII                                                  | 2.05  | 0.00215 |

|           |                 |                                                        |       |         |
|-----------|-----------------|--------------------------------------------------------|-------|---------|
| STEAP1    | ENSG00000164647 | six transmembrane epithelial antigen of the prostate 1 | 2.17  | 0.00245 |
| LINC00571 | ENSG00000223685 | long intergenic non-protein coding RNA 571             | 2.23  | 0.00254 |
| AOC2      | ENSG00000131480 | amine oxidase, copper containing 2                     | 2.27  | 0.00272 |
| RADIL     | ENSG00000157927 | Rap associating with DIL domain                        | -5.69 | 0.00278 |
| RARRES3   | ENSG00000133321 | retinoic acid receptor responder 3                     | -2.14 | 0.00279 |
| KDR       | ENSG00000128052 | kinase insert domain receptor                          | -2.26 | 0.00280 |
| ST7-AS1   | ENSG00000227199 | ST7 antisense RNA 1                                    | -2.14 | 0.00289 |
| C10orf90  | ENSG00000154493 | chromosome 10 open reading frame 90                    | -2.13 | 0.00389 |
| AGBL2     | ENSG00000165923 | ATP/GTP binding protein-like 2                         | -2.18 | 0.00544 |
| CCDC96    | ENSG00000173013 | coiled-coil domain containing 96                       | -2.13 | 0.00555 |
| BRICD5    | ENSG00000182685 | BRICHOS domain containing 5                            | 2.10  | 0.00583 |
| RP1       | ENSG00000104237 | retinitis pigmentosa 1 (autosomal dominant)            | -2.04 | 0.00616 |
| FAM74A3   | ENSG00000274355 | family with sequence similarity 74 member A3           | 2.06  | 0.00628 |
| PHYHIP    | ENSG00000168490 | phytanoyl-CoA 2-hydroxylase interacting protein        | -2.04 | 0.00642 |
| SNORD14E  | ENSG00000200879 | small nucleolar RNA, C/D box 14E                       | 2.37  | 0.00651 |

|              |                 |                                                    |       |         |
|--------------|-----------------|----------------------------------------------------|-------|---------|
| RNU5D-1      | ENSG00000200169 | RNA, U5D small nuclear 1                           | -2.83 | 0.00704 |
| LINC01547    | ENSG00000183250 | long intergenic non-protein coding RNA 1547        | -2.36 | 0.00869 |
| GPSM3        | ENSG00000213654 | G-protein signaling modulator 3                    | 2.03  | 0.0104  |
| SNORD14D     | ENSG00000207118 | small nucleolar RNA, C/D box 14D                   | 2.01  | 0.0105  |
| ATP10A       | ENSG00000206190 | ATPase phospholipid transporting 10A (putative)    | 2.12  | 0.0107  |
| LOC101927189 |                 |                                                    | -2.37 | 0.0121  |
| SNORD28      | ENSG00000274544 | small nucleolar RNA, C/D box 28                    | -2.35 | 0.0136  |
| LINC00310    | ENSG00000227456 | long intergenic non-protein coding RNA 310         | 2.14  | 0.0140  |
| ATP2A1-AS1   | ENSG00000260442 | ATP2A1 antisense RNA 1                             | 2.16  | 0.01474 |
| XKR5         | ENSG00000275591 | XK related 5                                       | -2.19 | 0.0156  |
| SNORD33      | ENSG00000252022 | Small nucleolar RNA Z195/SNORD33/SNORD32<br>family | 2.01  | 0.01617 |
| HPDL         | ENSG00000186603 | 4-hydroxyphenylpyruvate dioxygenase like           | -5.42 | 0.0206  |
| LOC554206    |                 |                                                    | -2.13 | 0.0231  |
| LOC100289361 |                 |                                                    | -2.20 | 0.0236  |
| SNORD100     | ENSG00000221500 | small nucleolar RNA, C/D box 100                   | -2.40 | 0.0293  |

---

|          |                 |                                    |       |        |
|----------|-----------------|------------------------------------|-------|--------|
| LRRC15   | ENSG00000172061 | leucine rich repeat containing 15  | -2.03 | 0.0307 |
| SLC16A14 | ENSG00000163053 | solute carrier family 16 member 14 | -2.32 | 0.0371 |
| TXNDC5   | ENSG00000239264 | thioredoxin domain containing 5    | -2.23 | 0.0408 |

---
