# Supplementary material for: Retinal Pigment Epithelial Cells are a Potential Reservoir for Ebola Virus in the Human Eye
Source: PubMed Central journal article supplement — Transl Vis Sci Technol. 2017 Jul 14;6(4):12. doi: 10.1167/tvst.6.4.12 (PMC5512973; doi:10.1167/tvst.6.4.12), 2017-07-14
Supplement: tvst-06-04-11_s07.pdf [file tvst-06-04-11_s07.pdf]

**Table S4.** Significantly up- and down-regulated pathways enriched in genes expressed by ARPE-19 human retinal pigment epithelial cells 24 hours following infection with EBOV.

|                                                         | <b>False discovery rate</b> |
|---------------------------------------------------------|-----------------------------|
| <b>Up-regulated pathways</b>                            |                             |
| Interferon alpha/beta signaling                         | 1.34E-08                    |
| Cholesterol biosynthesis                                | 3.85E-07                    |
| Cytosolic tRNA aminoacylation                           | 2.27E-05                    |
| Interferon Signaling                                    | 2.87E-05                    |
| Regulation of cholesterol biosynthesis by SREBP (SREBF) | 7.16E-05                    |
| Cytokine signaling in immune system                     | 2.08E-04                    |
| Steroid metabolism                                      | 2.11E-04                    |
| Activation of gene expression by SREBF (SREBP)          | 3.30E-04                    |
| PERK regulates gene expression                          | 4.20E-04                    |
| Unfolded Protein Response (UPR)                         | 5.32E-04                    |
| tRNA aminoacylation                                     | 6.54E-04                    |
| Aminoacyl-tRNA biosynthesis                             | 0.00102                     |
| HIF-1-alpha transcription factor network                | 0.00203                     |
| Protein processing in endoplasmic reticulum             | 0.00211                     |
| Steroid biosynthesis                                    | 0.00562                     |

|                                                                         |         |
|-------------------------------------------------------------------------|---------|
| Terpenoid backbone biosynthesis                                         | 0.00856 |
| Scavenging by Class F Receptors                                         | 0.0121  |
| AP-1 transcription factor network                                       | 0.0124  |
| Glycine serine metabolism                                               | 0.0133  |
| ATF4 activates genes                                                    | 0.0136  |
| ATF-2 transcription factor network                                      | 0.0186  |
| Norepinephrine neurotransmitter release cycle                           | 0.0226  |
| Transport of inorganic cations/anions and amino acids/oligopeptides     | 0.0232  |
| Amino acid transport across the plasma membrane                         | 0.0240  |
| Jak-STAT signaling pathway                                              | 0.0244  |
| Hepatitis C                                                             | 0.0245  |
| ATF6-alpha activates chaperone genes                                    | 0.0290  |
| Regulation of map kinase pathways through dual specificity phosphatases | 0.0290  |
| Negative regulators of RIG-I/MDA5 signaling                             | 0.0335  |
| Kit receptor                                                            | 0.0337  |
| RANKL                                                                   | 0.0338  |
| Immune System                                                           | 0.0366  |
| Antiviral mechanism by IFN-stimulated genes                             | 0.0367  |
| ISG15 antiviral mechanism                                               | 0.0367  |
| Alanine aspartate asparagine metabolism                                 | 0.0400  |
| Keratinocyte differentiation                                            | 0.0411  |

|                                                        |        |
|--------------------------------------------------------|--------|
| ATF6-alpha activates chaperones                        | 0.0415 |
| BMAL1:CLOCK, NPAS2 activates circadian gene expression | 0.0431 |
| SLC-mediated transmembrane transport                   | 0.0475 |

### **Down-regulated pathways**

|                                                                                |         |
|--------------------------------------------------------------------------------|---------|
| Tryptophan metabolism                                                          | 0.00454 |
| Defective AMN causes hereditary megaloblastic anemia 1                         | 0.0172  |
| Defective BTD causes biotinidase deficiency                                    | 0.0172  |
| Defective CD320 causes methylmalonic aciduria                                  | 0.0172  |
| Defective CUBN causes hereditary megaloblastic anemia 1                        | 0.0172  |
| Defective GIF causes intrinsic factor deficiency                               | 0.0172  |
| Defective HLCS causes multiple carboxylase deficiency                          | 0.0172  |
| Defective LMBRD1 causes methylmalonic aciduria and<br>homocystinuria type cb1F | 0.0172  |
| Defective MMAA causes methylmalonic aciduria type cb1A                         | 0.0172  |
| Defective MMAB causes methylmalonic aciduria type cb1B                         | 0.0172  |
| Defective MMACHC causes methylmalonic aciduria and<br>homocystinuria type cb1C | 0.0172  |
| Defective MMADHC causes methylmalonic aciduria and<br>homocystinuria type cb1D | 0.0172  |
| Defective MTR causes methylmalonic aciduria and<br>homocystinuria type cb1G    | 0.0172  |
| Defective MTRR causes methylmalonic aciduria and                               | 0.0172  |

|                                                        |        |
|--------------------------------------------------------|--------|
| homocystinuria type cblE                               |        |
| Defective MUT causes methylmalonic aciduria mut type   | 0.0172 |
| Defective TCN2 causes hereditary megaloblastic anemia  | 0.0172 |
| Defects in biotin (B7) metabolism                      | 0.0172 |
| Defects in cobalamin (B12) metabolism                  | 0.0172 |
| Defects in vitamin and cofactor metabolism             | 0.0172 |
| Metabolism of vitamins and cofactors                   | 0.0172 |
| Metabolism of water-soluble vitamins and cofactors     | 0.0172 |
| Tryptophan degradation                                 | 0.0200 |
| BMP2 signaling                                         | 0.0210 |
| Alk in cardiac myocytes                                | 0.0236 |
| Wnt signaling pathway                                  | 0.0259 |
| Synthesis of prostaglandins (PG) and thromboxanes (TX) | 0.0283 |
| GRB7 events in ERBB2 signaling                         | 0.0284 |
| Metabolism of xenobiotics by cytochrome P450           | 0.0356 |
| cGMP effects                                           | 0.0478 |
