# Supplementary material for: Retinal Pigment Epithelial Cells are a Potential Reservoir for Ebola Virus in the Human Eye
Source: PubMed Central journal article supplement — Transl Vis Sci Technol. 2017 Jul 14;6(4):12. doi: 10.1167/tvst.6.4.12 (PMC5512973; doi:10.1167/tvst.6.4.12), 2017-07-14
Supplement: tvst-06-04-11_s08.pdf [file tvst-06-04-11_s08.pdf]

**Table S5.** Significantly up- and down-regulated gene ontology terms enriched in genes expressed by ARPE-19 human retinal pigment epithelial cells 24 hours following infection with EBOV.

|                                                                                | <b>False discovery rate</b> |
|--------------------------------------------------------------------------------|-----------------------------|
| <b>Up-regulated gene ontology terms</b>                                        |                             |
| Type I interferon signaling pathway                                            | 2.29E-08                    |
| Cholesterol biosynthetic process                                               | 2.88E-08                    |
| Endoplasmic reticulum unfolded protein response                                | 2.07E-07                    |
| Negative regulation of viral genome replication                                | 5.60E-06                    |
| Defense response to virus                                                      | 7.57E-06                    |
| Innate immune response                                                         | 1.37E-05                    |
| Response to virus                                                              | 1.71E-05                    |
| Activation of signaling protein activity involved in unfolded protein response | 2.28E-05                    |
| ATP binding                                                                    | 2.92E-05                    |
| Cytokine-mediated signaling pathway                                            | 1.82E-04                    |
| Inactivation of MAPK activity                                                  | 8.17E-04                    |
| tRNA aminoacylation for protein translation                                    | 0.00229                     |
| 2'-5'-Oligoadenylate synthetase activity                                       | 0.00283                     |
| Aminoacyl-tRNA ligase activity                                                 | 0.00358                     |

|                                                             |         |
|-------------------------------------------------------------|---------|
| Isoprenoid biosynthetic process                             | 0.00367 |
| Response to unfolded protein                                | 0.00517 |
| Post-embryonic camera-type eye development                  | 0.00804 |
| Proline transmembrane transport                             | 0.00804 |
| Regulation of signal transduction                           | 0.00950 |
| SREBP signaling pathway                                     | 0.0178  |
| Circadian rhythm                                            | 0.0180  |
| RNA polymerase II regulatory region sequence-specific       |         |
| DNA binding                                                 | 0.0203  |
| Endoplasmic reticulum                                       | 0.0208  |
| MAP kinase tyrosine/serine/threonine phosphatase activity   | 0.0211  |
| Middle ear morphogenesis                                    | 0.0214  |
| Response to endoplasmic reticulum stress                    | 0.0229  |
| Intrinsic apoptotic signaling pathway in response to        |         |
| endoplasmic reticulum stress                                | 0.0234  |
| Cellular response to antibiotic                             | 0.0250  |
| Coenzyme binding                                            | 0.0255  |
| Cytoplasm                                                   | 0.0315  |
| Organic cation transmembrane transporter activity           | 0.0387  |
| Endoderm formation                                          | 0.0397  |
| [Heparan sulfate]-glucosamine 3-sulfotransferase 3 activity | 0.0406  |
| Interleukin-8 receptor binding                              | 0.0406  |
| Regulation of ribonuclease activity                         | 0.0406  |

---

|                                                                      |        |
|----------------------------------------------------------------------|--------|
| Immune response                                                      | 0.0413 |
| Cellular response to hydrogen peroxide                               | 0.0419 |
| Small molecule metabolic process                                     | 0.0427 |
| Cell morphogenesis                                                   | 0.0428 |
| Positive regulation of transcription from RNA polymerase II promoter | 0.0442 |
| Cellular response to interferon-alpha                                | 0.0449 |
| Proline transport                                                    | 0.0449 |
| Nucleotidyltransferase activity                                      | 0.0453 |

---

**Down-regulated gene ontology terms**

---

|                      |        |
|----------------------|--------|
| Cell fate commitment | 0.0229 |
|----------------------|--------|

---
