# Supplementary material for: Retinal Pigment Epithelial Cells are a Potential Reservoir for Ebola Virus in the Human Eye
Source: PubMed Central journal article supplement — Transl Vis Sci Technol. 2017 Jul 14;6(4):12. doi: 10.1167/tvst.6.4.12 (PMC5512973; doi:10.1167/tvst.6.4.12), 2017-07-14
Supplement: tvst-06-04-11_s09.pdf [file tvst-06-04-11_s09.pdf]

**Table S6.** Type I interferon-regulated genes that were highly expressed in ARPE-19 human retinal pigment epithelial cells 24 hours following infection with EBOV.

---

| <b>Symbol</b> | <b>Ensembl ID</b> | <b>Name</b>                                        |
|---------------|-------------------|----------------------------------------------------|
| AAK1          | ENSG00000115977   | AP2 associated kinase 1                            |
| ABTB2         | ENSG00000166016   | ankyrin repeat and BTB (POZ) domain containing 2   |
| ADM           | ENSG00000148926   | adrenomedullin                                     |
| ADORA2B       | ENSG00000170425   | adenosine A2b receptor                             |
| AEN           | ENSG00000181026   | apoptosis enhancing nuclease                       |
| AIM1          | ENSG00000112297   | absent in melanoma 1                               |
| AK2           | ENSG00000004455   | adenylate kinase 2                                 |
| AK4           | ENSG00000162433   | adenylate kinase 4                                 |
| ALPK3         | ENSG00000136383   | alpha-kinase 3                                     |
| ARHGAP26      | ENSG00000145819   | Rho GTPase activating protein 26                   |
| ARHGEF2       | ENSG00000116584   | Rho/Rac guanine nucleotide exchange factor (GEF) 2 |

---

|          |                 |                                                                   |
|----------|-----------------|-------------------------------------------------------------------|
| ARID3A   | ENSG00000116017 | AT rich interactive domain 3A (BRIGHT-like)                       |
| ARID5A   | ENSG00000196843 | AT rich interactive domain 5A (MRF1-like)                         |
| ARRDC2   | ENSG00000105643 | arrestin domain containing 2                                      |
| ARSJ     | ENSG00000180801 | arylsulfatase family, member J                                    |
| ASNS     | ENSG00000070669 | asparagine synthetase (glutamine-hydrolyzing)                     |
| ATF3     | ENSG00000162772 | activating transcription factor 3                                 |
| ATP10A   | ENSG00000206190 | ATPase, class V, type 10A                                         |
| BIRC3    | ENSG00000023445 | baculoviral IAP repeat containing 3                               |
| C17orf67 | ENSG00000214226 | chromosome 17 open reading frame 67                               |
| C4orf32  | ENSG00000174749 | chromosome 4 open reading frame 32                                |
| CCRN4L   | ENSG00000151014 | CCR4 carbon catabolite repression 4-like ( <i>S. cerevisiae</i> ) |
| CD274    | ENSG00000120217 | CD274 molecule                                                    |
| CHSY1    | ENSG00000131873 | chondroitin sulfate synthase 1                                    |
| CMPK2    | ENSG00000134326 | cytidine monophosphate (UMP-CMP) kinase 2, mitochondrial          |
| CTH      | ENSG00000116761 | cystathionase (cystathionine gamma-lyase)                         |
| CXCL3    | ENSG00000163734 | chemokine (C-X-C motif) ligand 3                                  |

|         |                 |                                                        |
|---------|-----------------|--------------------------------------------------------|
| CXCR4   | ENSG00000121966 | chemokine (C-X-C motif) receptor 4                     |
| CYP51A1 | ENSG00000001630 | cytochrome P450, family 51, subfamily A, polypeptide 1 |
| DDIT3   | ENSG00000175197 | DNA-damage-inducible transcript 3                      |
| DDX58   | ENSG00000107201 | DEAD (Asp-Glu-Ala-Asp) box polypeptide 58              |
| DGKE    | ENSG00000153933 | diacylglycerol kinase, epsilon 64kDa                   |
| DOK3    | ENSG00000146094 | docking protein 3                                      |
| DOK5    | ENSG00000101134 | docking protein 5                                      |
| DUSP1   | ENSG00000120129 | dual specificity phosphatase 1                         |
| DUSP4   | ENSG00000120875 | dual specificity phosphatase 4                         |
| DUSP5   | ENSG00000138166 | dual specificity phosphatase 5                         |
| EGR1    | ENSG00000120738 | early growth response 1                                |
| ETV5    | ENSG00000244405 | ets variant 5                                          |
| FEM1C   | ENSG00000145780 | fem-1 homolog c (C. elegans)                           |
| FRMD3   | ENSG00000172159 | FERM domain containing 3                               |
| GCH1    | ENSG00000131979 | GTP cyclohydrolase 1                                   |
| GTPBP2  | ENSG00000172432 | GTP binding protein 2                                  |

|        |                 |                                                                |
|--------|-----------------|----------------------------------------------------------------|
| HBEGF  | ENSG00000113070 | heparin-binding EGF-like growth factor                         |
| HELZ2  | ENSG00000130589 | helicase with zinc finger 2, transcriptional coactivator       |
| HERC5  | ENSG00000138646 | HECT and RLD domain containing E3 ubiquitin protein ligase 5   |
| HEY1   | ENSG00000164683 | hes-related family bHLH transcription factor with YRPW motif 1 |
| HK2    | ENSG00000159399 | hexokinase 2                                                   |
| HMGR   | ENSG00000113161 | 3-hydroxy-3-methylglutaryl-CoA reductase                       |
| HOMER1 | ENSG00000152413 | homer homolog 1 (Drosophila)                                   |
| HRH1   | ENSG00000196639 | histamine receptor H1                                          |
| IER2   | ENSG00000160888 | immediate early response 2                                     |
| IFI44  | ENSG00000137965 | interferon-induced protein 44                                  |
| IFI44L | ENSG00000137959 | interferon-induced protein 44-like                             |
| IFI6   | ENSG00000126709 | interferon, alpha-inducible protein 6                          |
| IFIT1  | ENSG00000185745 | interferon-induced protein with tetratricopeptide repeats 1    |
| IFIT2  | ENSG00000119922 | interferon-induced protein with tetratricopeptide repeats 2    |
| IFIT3  | ENSG00000119917 | interferon-induced protein with tetratricopeptide repeats 3    |
| IFITM1 | ENSG00000185885 | interferon induced transmembrane protein 1                     |

|          |                 |                                                               |
|----------|-----------------|---------------------------------------------------------------|
| IFNB1    | ENSG00000171855 | interferon, beta 1, fibroblast                                |
| IFRD1    | ENSG00000006652 | interferon-related developmental regulator 1                  |
| IL32     | ENSG00000008517 | interleukin 32                                                |
| IL4R     | ENSG00000077238 | interleukin 4 receptor                                        |
| IL7R     | ENSG00000168685 | interleukin 7 receptor                                        |
| IL8      | ENSG00000169429 | interleukin 8                                                 |
| INSIG1   | ENSG00000186480 | insulin induced gene 1                                        |
| ISG15    | ENSG00000187608 | ISG15 ubiquitin-like modifier                                 |
| ISG20    | ENSG00000172183 | interferon stimulated exonuclease gene 20kDa                  |
| ITGB3    | ENSG00000259207 | integrin, beta 3 (platelet glycoprotein IIIa, antigen CD61)   |
| KCNG1    | ENSG00000026559 | potassium voltage-gated channel, subfamily G, member 1        |
| KCNQ3    | ENSG00000184156 | potassium voltage-gated channel, KQT-like subfamily, member 3 |
| KCTD12   | ENSG00000178695 | potassium channel tetramerization domain containing 12        |
| KIAA1715 | ENSG00000144320 | KIAA1715                                                      |
| KLF4     | ENSG00000136826 | Kruppel-like factor 4 (gut)                                   |
| KLF6     | ENSG00000067082 | Kruppel-like factor 6                                         |

|          |                 |                                                                  |
|----------|-----------------|------------------------------------------------------------------|
| LDLR     | ENSG00000130164 | low density lipoprotein receptor                                 |
| MAFF     | ENSG00000185022 | v-maf avian musculoaponeurotic fibrosarcoma oncogene homolog F   |
| MAMLD1   | ENSG00000013619 | mastermind-like domain containing 1                              |
| MAP3K5   | ENSG00000197442 | mitogen-activated protein kinase kinase kinase 5                 |
| MAPK13   | ENSG00000156711 | mitogen-activated protein kinase 13                              |
| MB21D1   | ENSG00000164430 | Mab-21 domain containing 1                                       |
| METTL1   | ENSG00000037897 | methyltransferase like 1                                         |
| METTL21B | ENSG00000123427 | methyltransferase like 21B                                       |
| MFSD2A   | ENSG00000168389 | major facilitator superfamily domain containing 2A               |
| MGLL     | ENSG00000074416 | monoglyceride lipase                                             |
| MINA     | ENSG00000170854 | MYC induced nuclear antigen                                      |
| MOCOS    | ENSG00000075643 | molybdenum cofactor sulfurase                                    |
| MSMO1    | ENSG00000052802 | methylsterol monooxygenase 1                                     |
| MSX1     | ENSG00000163132 | msh homeobox 1                                                   |
| MT1X     | ENSG00000187193 | metallothionein 1X                                               |
| MTHFD1L  | ENSG00000120254 | methylenetetrahydrofolate dehydrogenase (NADP+ dependent) 1-like |

|          |                 |                                                                                                         |
|----------|-----------------|---------------------------------------------------------------------------------------------------------|
| MTHFD2   | ENSG00000065911 | methylenetetrahydrofolate dehydrogenase (NADP+ dependent) 2,<br>methenyltetrahydrofolate cyclohydrolase |
| MX1      | ENSG00000157601 | myxovirus (influenza virus) resistance 1, interferon-inducible protein<br>p78 (mouse)                   |
| MXD1     | ENSG00000059728 | MAX dimerization protein 1                                                                              |
| N4BP3    | ENSG00000145911 | NEDD4 binding protein 3                                                                                 |
| NAMPT    | ENSG00000105835 | nicotinamide phosphoribosyltransferase                                                                  |
| NDRG1    | ENSG00000104419 | N-myc downstream regulated 1                                                                            |
| OAS1     | ENSG00000089127 | 2'-5'-oligoadenylate synthetase 1, 40/46kDa                                                             |
| OAS2     | ENSG00000111335 | 2'-5'-oligoadenylate synthetase 2, 69/71kDa                                                             |
| OAS3     | ENSG00000111331 | 2'-5'-oligoadenylate synthetase 3, 100kDa                                                               |
| OASL     | ENSG00000135114 | 2'-5'-oligoadenylate synthetase-like                                                                    |
| OSMR     | ENSG00000145623 | oncostatin M receptor                                                                                   |
| PAPD7    | ENSG00000112941 | PAP associated domain containing 7                                                                      |
| PDCD1LG2 | ENSG00000197646 | programmed cell death 1 ligand 2                                                                        |
| PHLDA1   | ENSG00000139289 | pleckstrin homology-like domain, family A, member 1                                                     |

|         |                 |                                                                                              |
|---------|-----------------|----------------------------------------------------------------------------------------------|
| PHLDA2  | ENSG00000181649 | pleckstrin homology-like domain, family A, member 2                                          |
| PLAGL1  | ENSG00000118495 | pleiomorphic adenoma gene-like 1                                                             |
| PLEKHA4 | ENSG00000105559 | pleckstrin homology domain containing, family A (phosphoinositide binding specific) member 4 |
| PLK3    | ENSG00000173846 | polo-like kinase 3                                                                           |
| PRKCE   | ENSG00000171132 | protein kinase C, epsilon                                                                    |
| RAB20   | ENSG00000139832 | RAB20, member RAS oncogene family                                                            |
| RASSF2  | ENSG00000101265 | Ras association (RalGDS/AF-6) domain family member 2                                         |
| RDH11   | ENSG00000072042 | retinol dehydrogenase 11 (all-trans/9-cis/11-cis)                                            |
| RNF19B  | ENSG00000116514 | ring finger protein 19B                                                                      |
| RNMT    | ENSG00000101654 | RNA (guanine-7-) methyltransferase                                                           |
| RSAD2   | ENSG00000134321 | radical S-adenosyl methionine domain containing 2                                            |
| SAMD4A  | ENSG00000020577 | sterile alpha motif domain containing 4A                                                     |
| SAMD9   | ENSG00000205413 | sterile alpha motif domain containing 9                                                      |
| SCD     | ENSG00000099194 | stearoyl-CoA desaturase (delta-9-desaturase)                                                 |
| SERTAD2 | ENSG00000179833 | SERTA domain containing 2                                                                    |



|          |                 |                                                                                               |
|----------|-----------------|-----------------------------------------------------------------------------------------------|
| SH3D21   | ENSG00000214193 | SH3 domain containing 21                                                                      |
| SH3PXD2A | ENSG00000107957 | SH3 and PX domains 2A                                                                         |
| SLC16A6  | ENSG00000108932 | solute carrier family 16, member 6                                                            |
| SLC20A1  | ENSG00000144136 | solute carrier family 20 (phosphate transporter), member 1                                    |
| SLC22A13 | ENSG00000172940 | solute carrier family 22 (organic anion/urate transporter), member 13                         |
| SLC25A25 | ENSG00000148339 | solute carrier family 25 (mitochondrial carrier; phosphate carrier),<br>member 25             |
| SLC36A1  | ENSG00000123643 | solute carrier family 36 (proton/amino acid symporter), member 1                              |
| SLC7A1   | ENSG00000139514 | solute carrier family 7 (cationic amino acid transporter, y <sup>+</sup> system),<br>member 1 |
| SLFN5    | ENSG00000166750 | schlafen family member 5                                                                      |
| SMOX     | ENSG00000088826 | spermine oxidase                                                                              |
| SOWAHC   | ENSG00000198142 | sosondowah ankyrin repeat domain family member C                                              |
| SP140    | ENSG00000079263 | SP140 nuclear body protein                                                                    |
| SPOCK2   | ENSG00000107742 | sparc/osteonectin, cwcv and kazal-like domains proteoglycan<br>(testican) 2                   |

|         |                 |                                                             |
|---------|-----------------|-------------------------------------------------------------|
| SPRY1   | ENSG00000164056 | sprouty homolog 1, antagonist of FGF signaling (Drosophila) |
| SQLE    | ENSG00000104549 | squalene epoxidase                                          |
| STARD4  | ENSG00000164211 | StAR-related lipid transfer (START) domain containing 4     |
| STX11   | ENSG00000135604 | syntaxin 11                                                 |
| TGFA    | ENSG00000163235 | transforming growth factor, alpha                           |
| THEMIS2 | ENSG00000130775 | thymocyte selection associated family member 2              |
| TMEM71  | ENSG00000165071 | transmembrane protein 71                                    |
| TNFAIP3 | ENSG00000118503 | tumor necrosis factor, alpha-induced protein 3              |
| TRAF1   | ENSG00000056558 | TNF receptor-associated factor 1                            |
| TRAF5   | ENSG00000082512 | TNF receptor-associated factor 5                            |
| TRIB2   | ENSG00000071575 | tribbles pseudokinase 2                                     |
| TRIB3   | ENSG00000101255 | tribbles pseudokinase 3                                     |
| TRIM25  | ENSG00000121060 | tripartite motif containing 25                              |
| UBASH3B | ENSG00000154127 | ubiquitin associated and SH3 domain containing B            |
| USP18   | ENSG00000184979 | ubiquitin specific peptidase 18                             |
| VEGFA   | ENSG00000112715 | vascular endothelial growth factor A                        |

---

|          |                 |                                 |
|----------|-----------------|---------------------------------|
| VTRNA1-3 | ENSG00000202515 | vault RNA 1-3                   |
| WARS     | ENSG00000140105 | tryptophanyl-tRNA synthetase    |
| XDH      | ENSG00000158125 | xanthine dehydrogenase          |
| XIAP     | ENSG00000101966 | X-linked inhibitor of apoptosis |
| XPOT     | ENSG00000184575 | exportin, tRNA                  |
| ZNF131   | ENSG00000172262 | zinc finger protein 131         |

---
