# Supplementary figures and images for: Retinal Pigment Epithelial Cells are a Potential Reservoir for Ebola Virus in the Human Eye
Source: PubMed Central journal article supplement — Transl Vis Sci Technol. 2017 Jul 14;6(4):12. doi: 10.1167/tvst.6.4.12 (PMC5512973; doi:10.1167/tvst.6.4.12), 2017-07-14

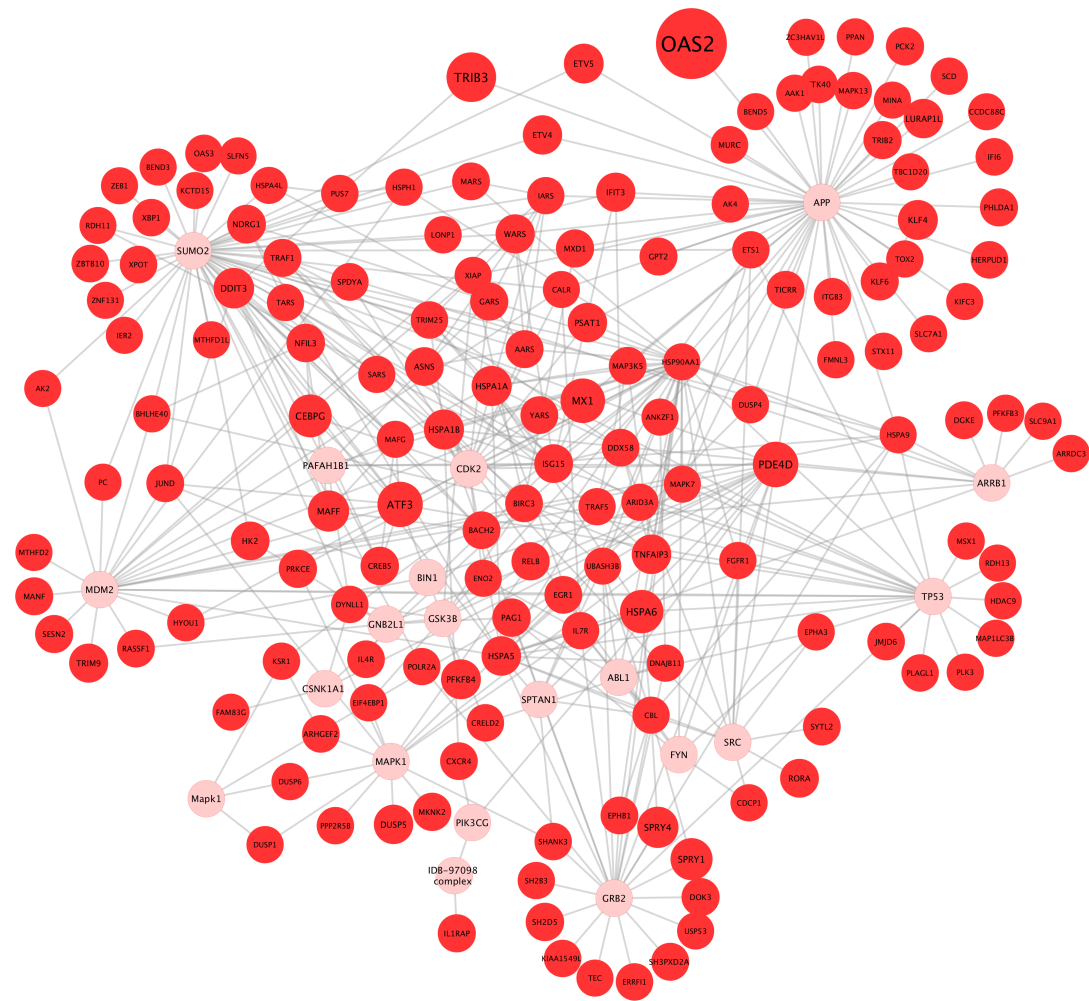

Fig. S2. Enlargement of Fig. 3C.

Supplement: tvst-06-04-11_s02.pdf [file tvst-06-04-11_s02.pdf]

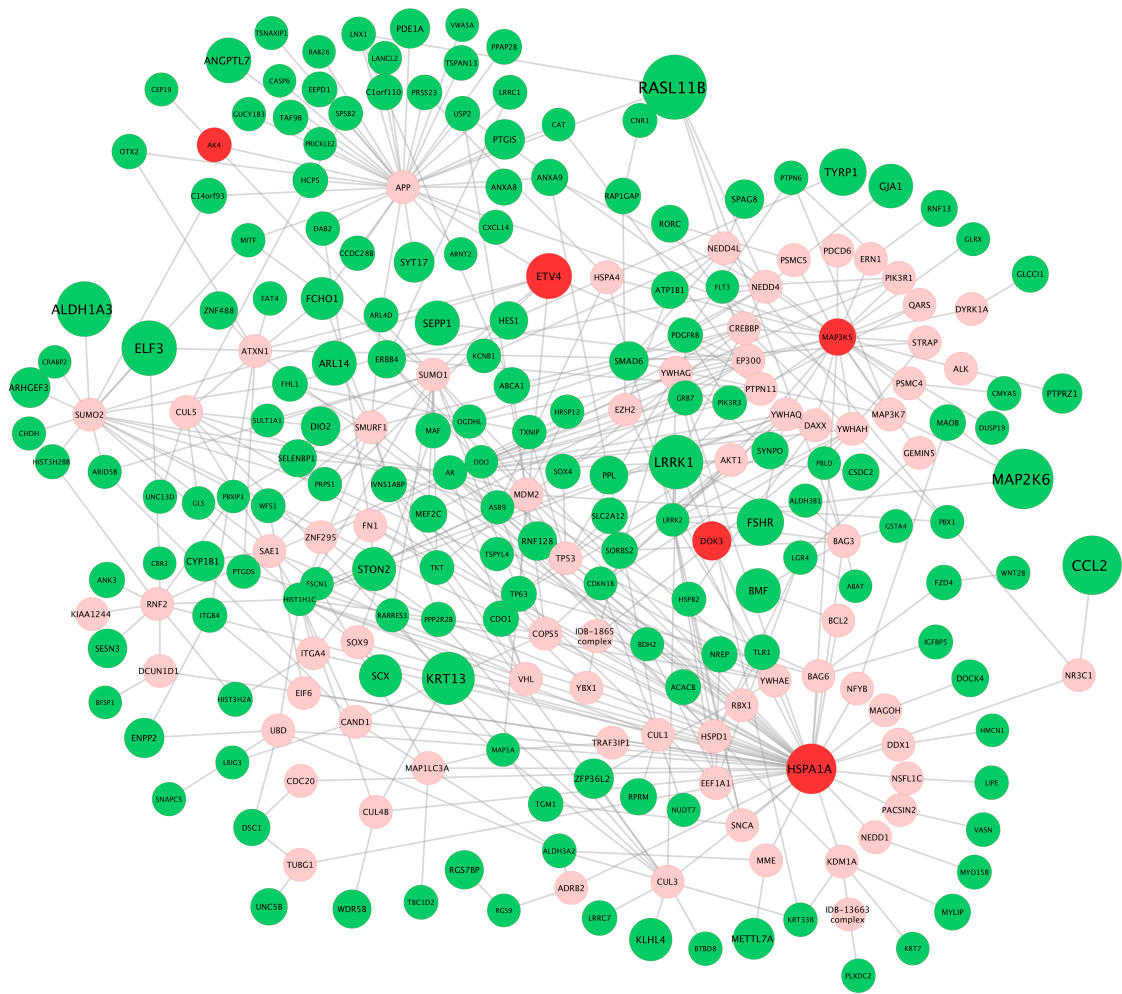

Fig. S3. Enlargement of Fig. 3D.

Supplement: tvst-06-04-11_s03.pdf [file tvst-06-04-11_s03.pdf]
